# Supplementary material for: Making sense of missense variants in TTN-related congenital myopathies
Source: PubMed Central journal article supplement (PMC7882473; doi:10.1007/s00401-020-02257-0), 2021-01-15
Supplement: 401_2020_2257_MOESM2_ESM.pdf [file 401_2020_2257_MOESM2_ESM.pdf]

# Making sense of missense variants in *TTN*-related congenital myopathies

Martin Rees *et al*

## Supplementary Online Material

Supplementary Figure 1: Western blots of low density SDS-PAGE gels probing Titin expression in skeletal or cardiac tissue from three congenital myopathy patients.

Supplementary Figure 2: Bioinformatic analysis of titin missense variants.

Supplementary Figure 3: Western blot assessing total expression of WT and missense variant-containing titin domains.

Supplementary Figure 4: Western blot assessing soluble expression of WT and missense variant-containing titin domains.

Supplementary Figure 5: 1D nuclear magnetic resonance of Fn3-90 WT and Gly27849Val.

Supplementary Figure 6: Thermal denaturation circular dichroism of Fn3-20 WT and Leu18237Pro.

Supplementary Figure 7: Differential scanning fluorimetry thermal denaturation curves of selected WT and missense variant-containing titin domains.

Supplementary Figure 8: Confocal immunofluorescence microscopy of neonatal rat cardiomyocytes expressing GFP-tagged titin Ig-125-126 WT and Val22232Glu, and Ig141-142 WT and Gly27849Val.

Supplementary Figure 9: Quantification of titin fragment localization to the Z-disk / I-band.

Supplementary Figure 10: Confocal microscopic images showing expression of titin fragments in HEK293 cells.

Supplementary Figure 11: Bar chart showing classification of localisation of titin fragments expressed in HEK293 cells.

Supplementary Figure 12: Assessment of solubility of WT and variant titin fragments expressed in HEK293 cells.

Supplementary Table 1: DNA and protein phasing for domains expressed in this study, corresponding to the Titin IC transcript (NM\_001267550).

Supplementary Table 4: *In silico* predictions for the effect of patient and common missense mutations.

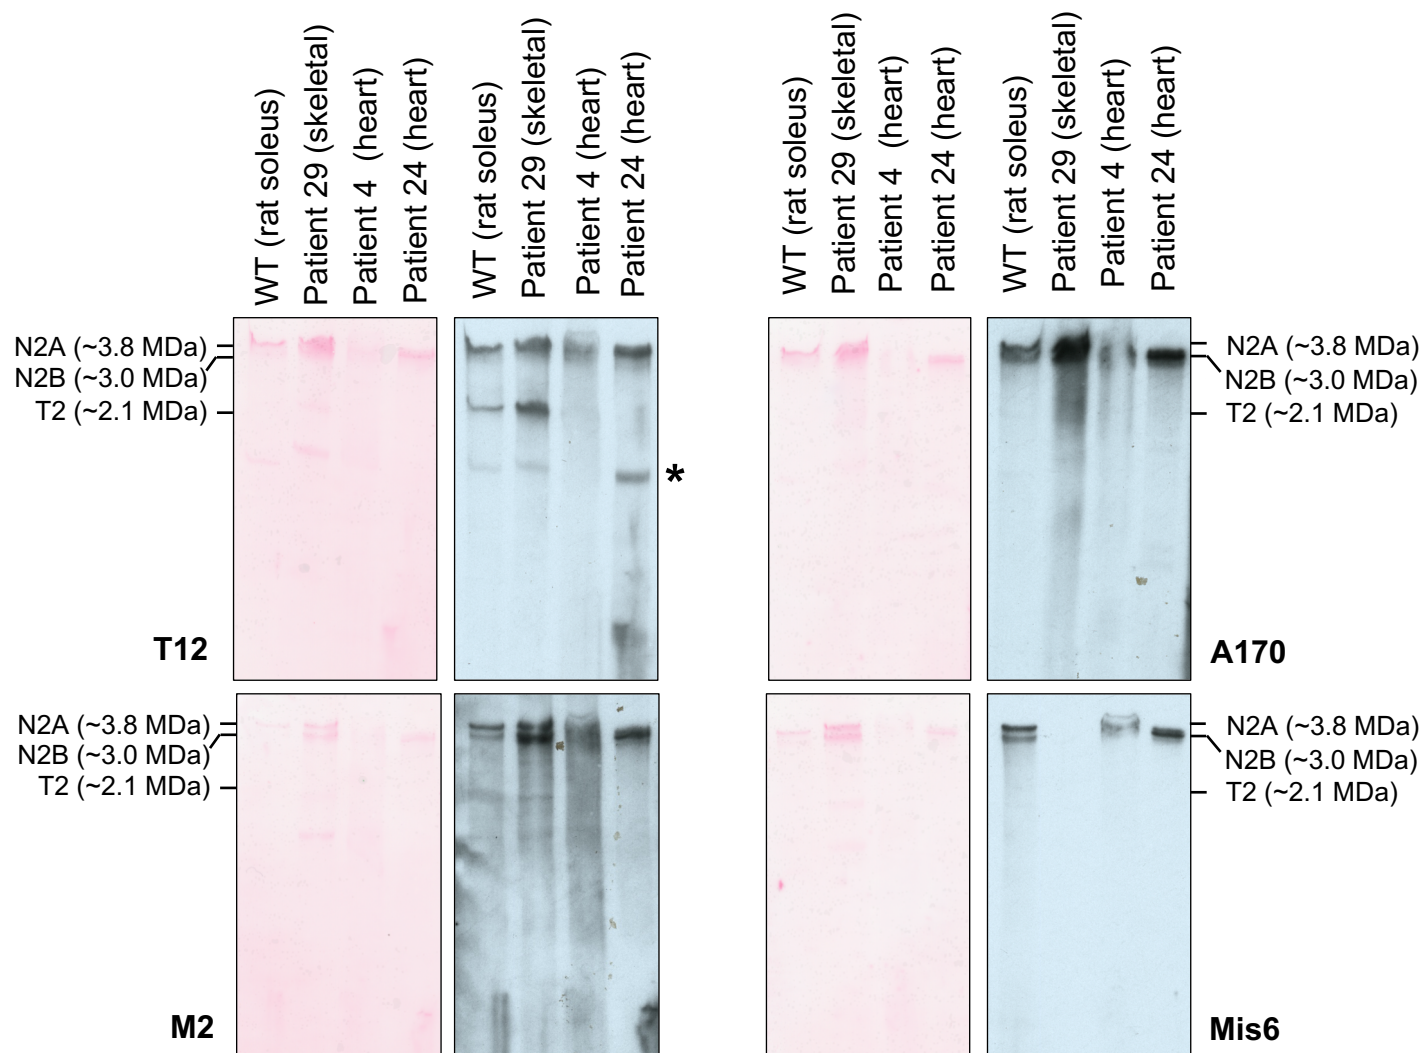

**Supplementary Figure 1**

**Western blots of low density SDS-PAGE gels probing Titin expression in skeletal or cardiac tissue from three congenital myopathy patients.** Antibodies used recognise either the N-terminal (T12) or C-terminal region (A170, TM2, Mis6) of Titin. Asterisk next to possible truncated fragment in patient 24 sample. Migration of Titin transcript N2A (skeletal muscle), N2B (cardiac muscle) and N-terminal degradation product T2 indicated.

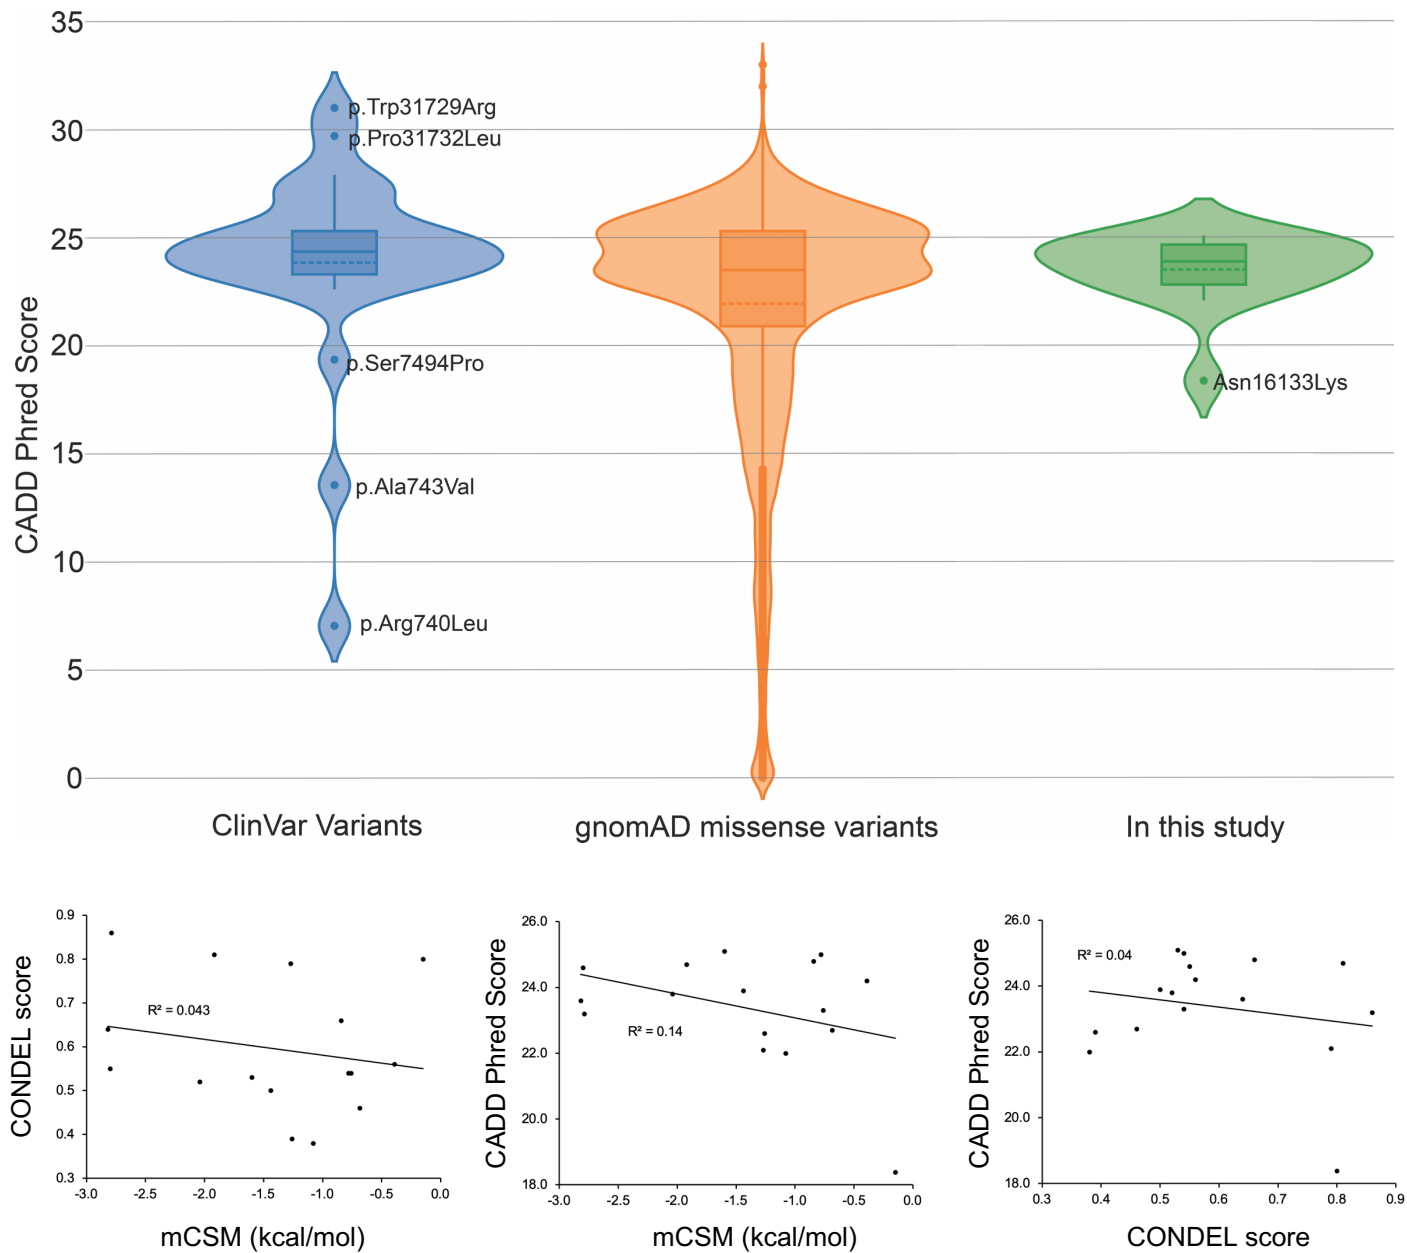

## Supplementary Figure 2

**Bioinformatic analysis of titin missense variants.** Violin plots with statistical analysis of the CADD phred scores of reported disease causing titin missense variants from ClinVar database and selected missense variants for this study compared to all gnomAD titin missense variants (top). The Mann-Whitney U test showed a mild significance ( $p=0.0412$ ) in the comparison of published ClinVar variants vs. gnomAD variants while the selected variants showed no significance ( $p<0.7549$ ). Plots comparing mCSM and CONDEL values and CADD Phred scores for missense variants in the disease cohort (bottom).

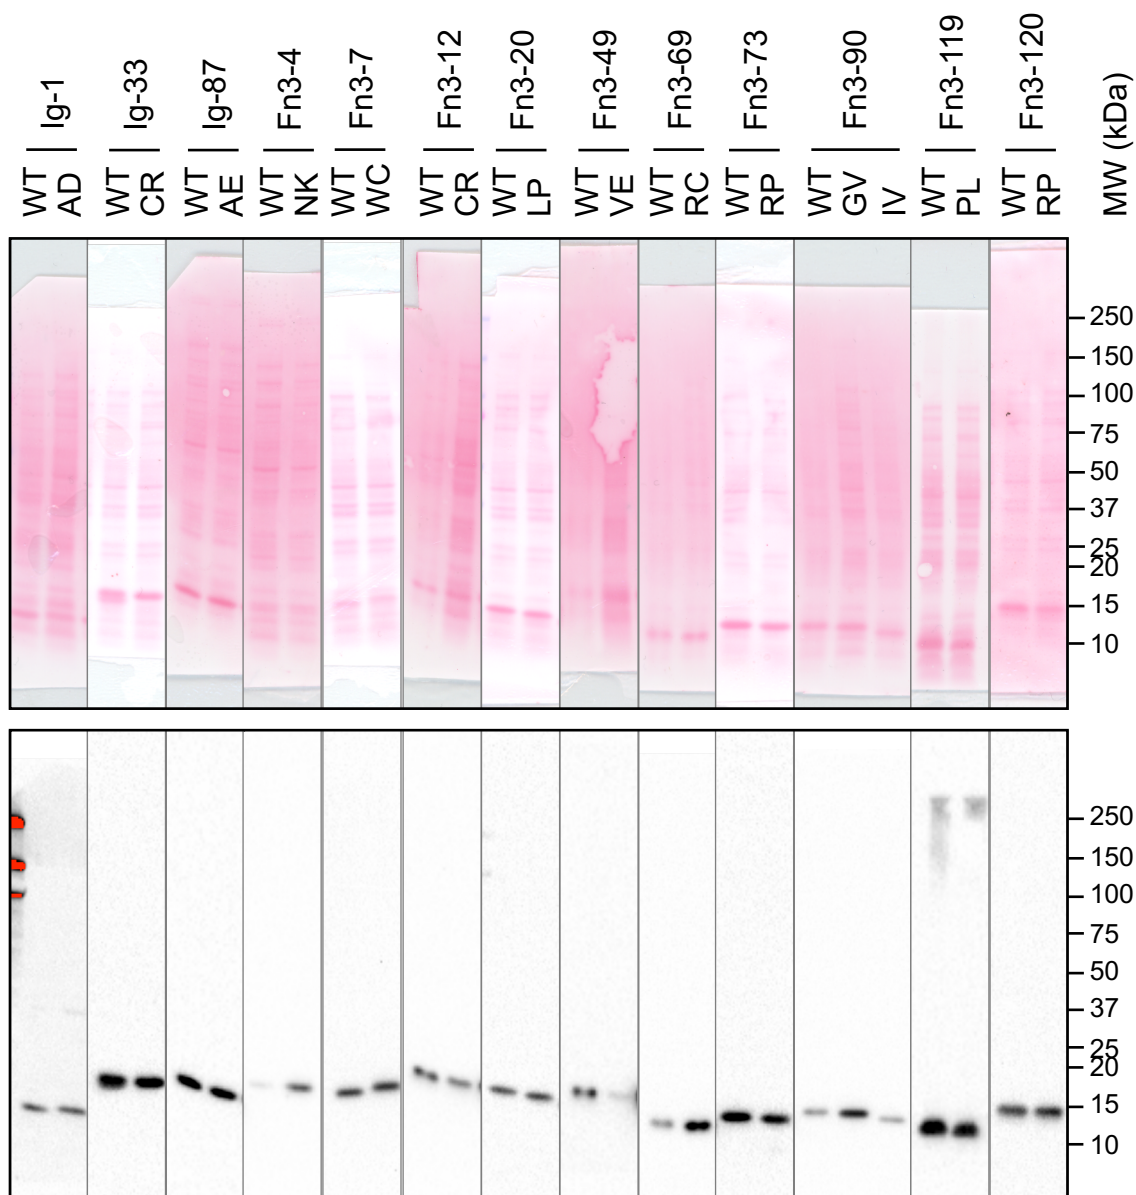

### Supplementary Figure 3

**Western blot assessing total expression of WT and missense variant-containing titin domains.** Bacterial cultures expressing His-tagged titin domains were lysed, separated into total and soluble fractions, run on Western blot and probed with anti-His tag antibody. Total fractions including Ponceau red staining shown here without cropping.

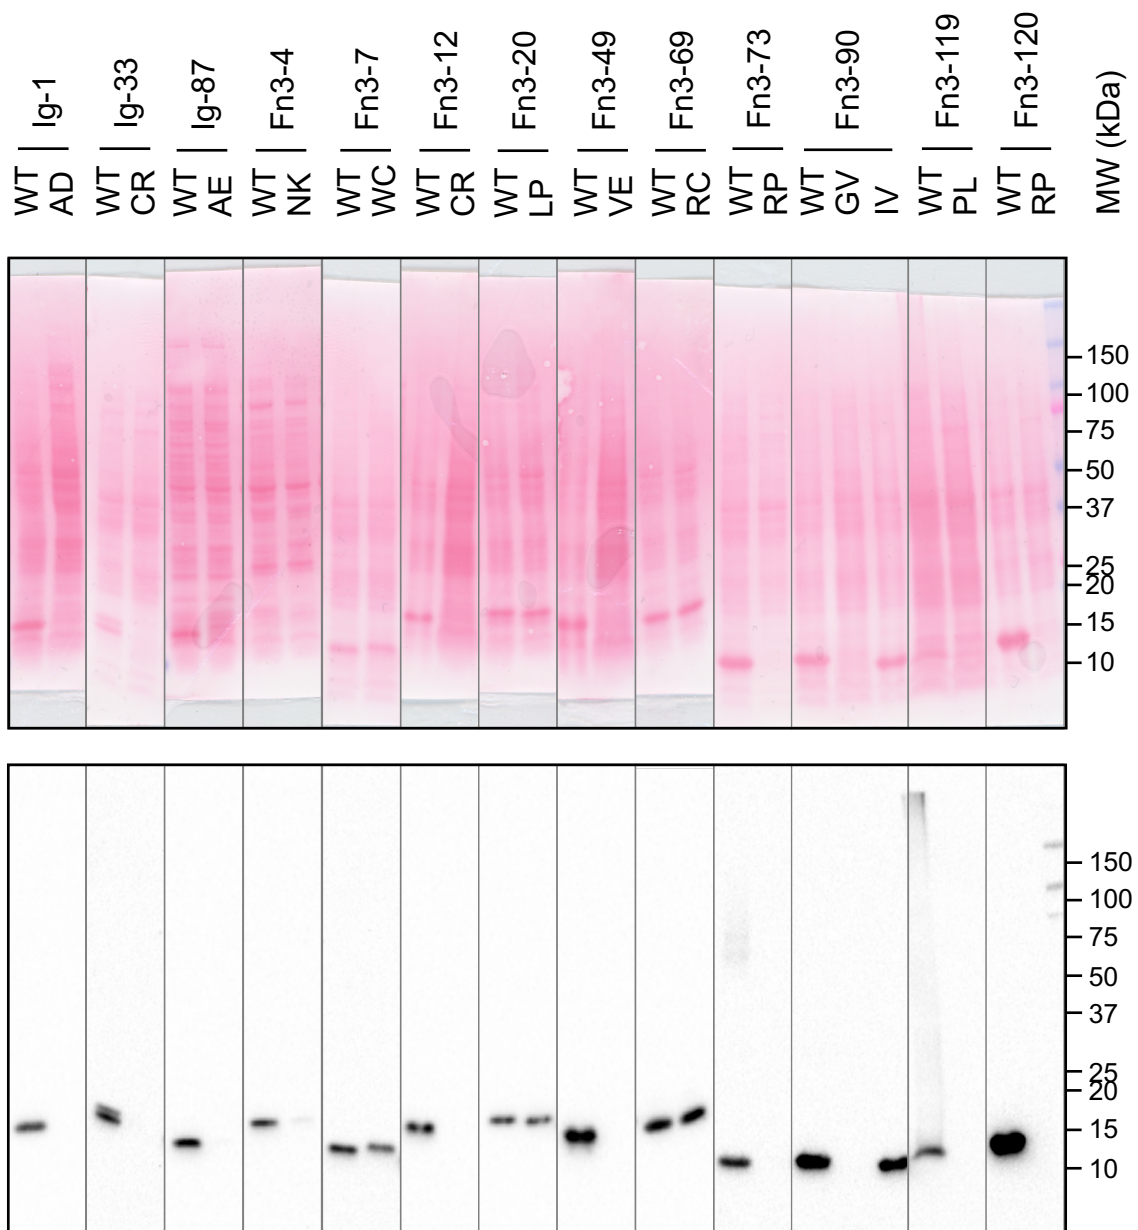

#### Supplementary Figure 4

**Western blot assessing soluble expression of WT and missense variant-containing titin domains.** Soluble fractions including Ponceau red staining shown here without cropping.

## Fn3-90

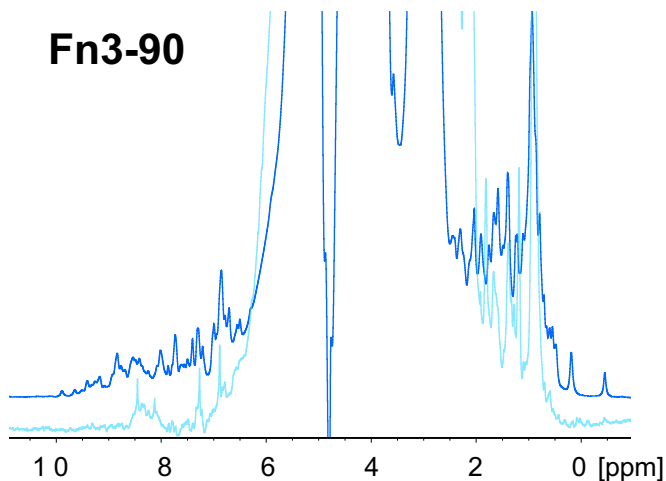

## Supplementary Figure 5

1D nuclear magnetic resonance of Fn3-90 WT (dark blue) and Gly27849Val (light blue).

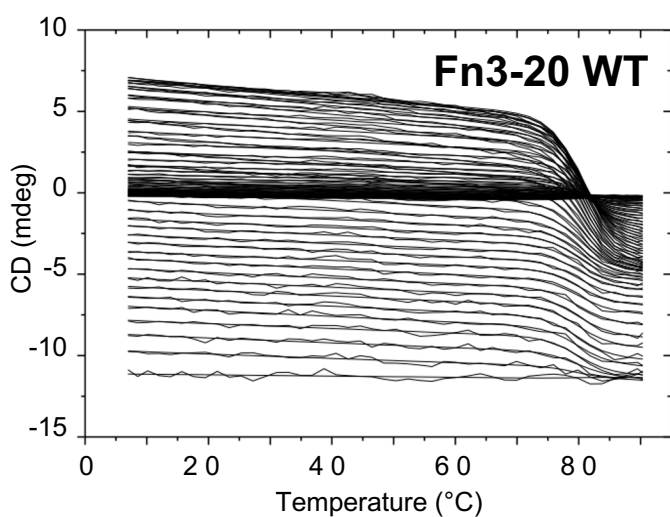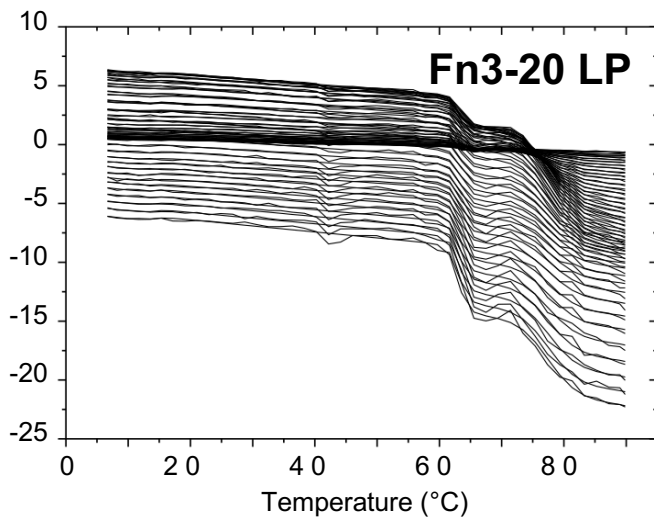

## Supplementary Figure 6

Thermal denaturation circular dichroism of Fn3-20 WT (left) and Leu18237Pro (right).

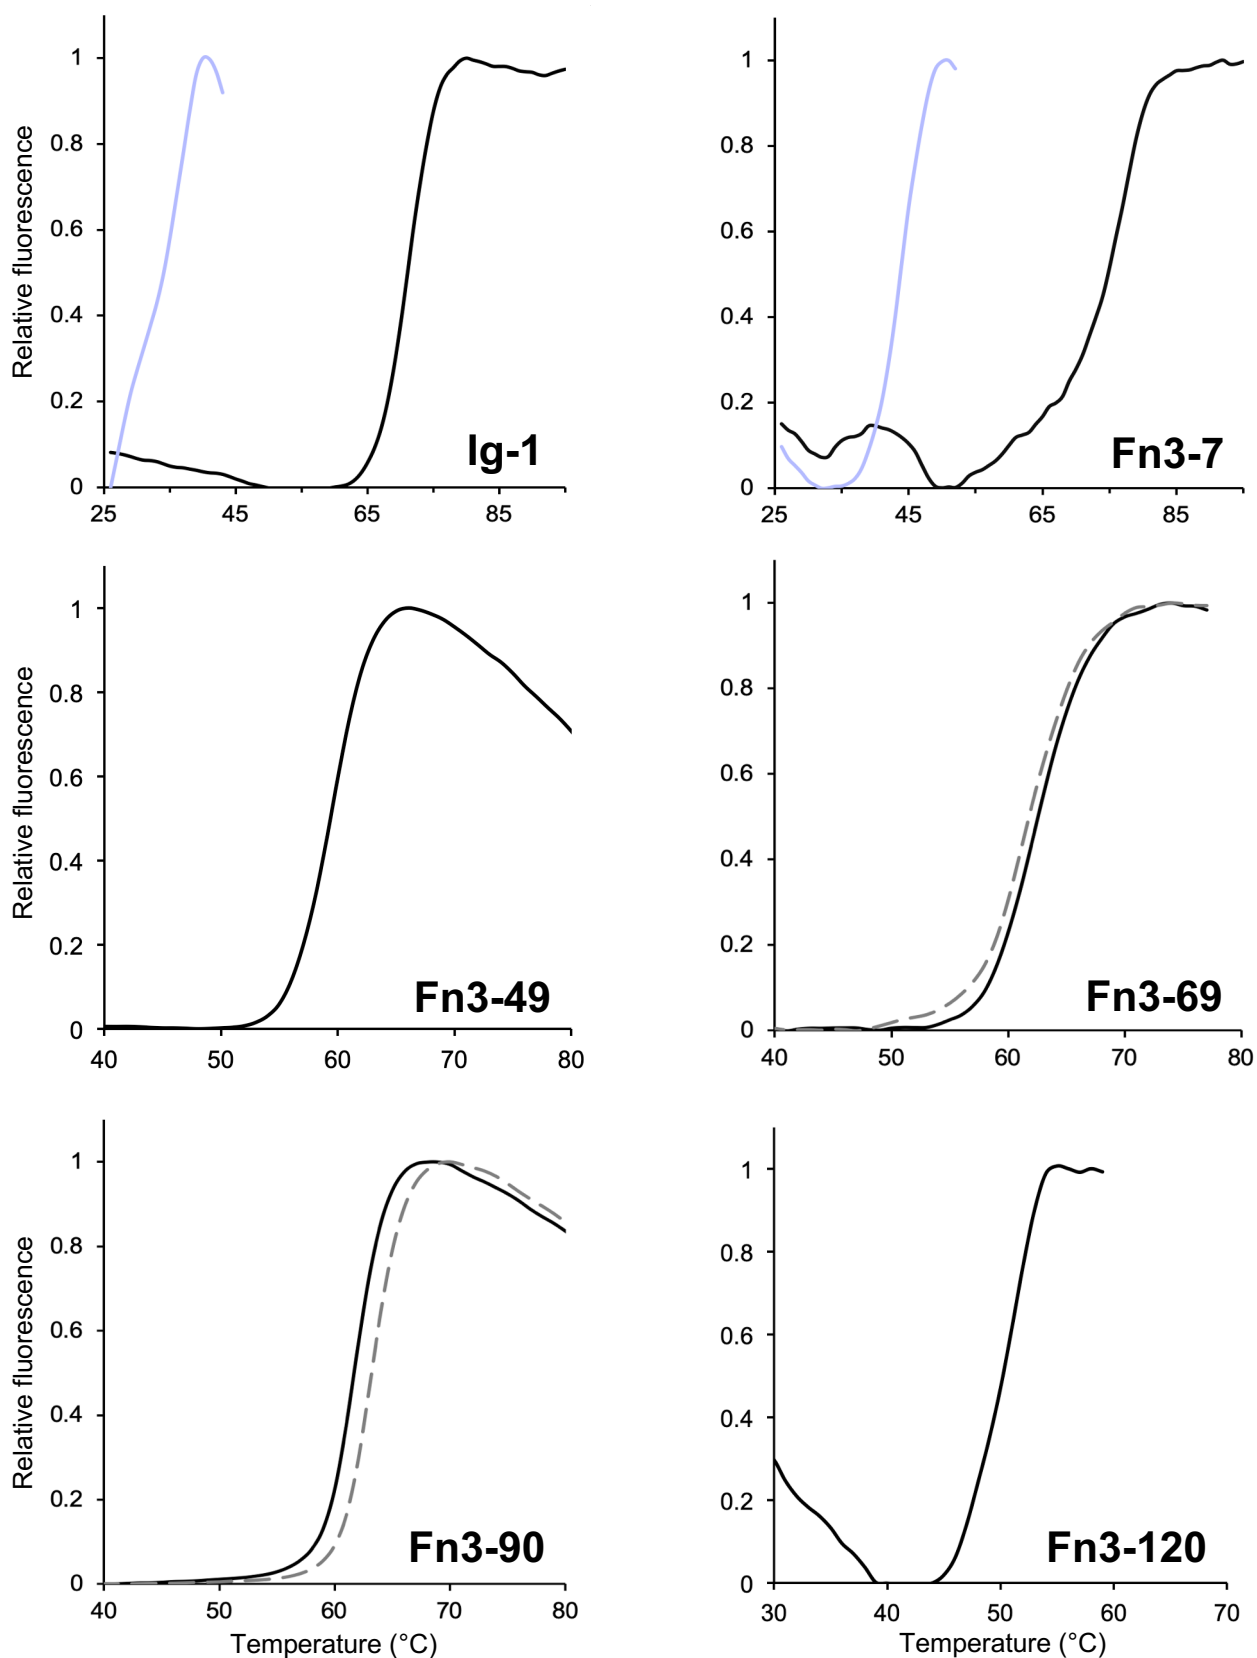

### Supplementary Figure 7

**Differential scanning fluorimetry thermal denaturation curves of selected WT and missense variant-containing titin domains.** Shown here are denaturation curves for WT and disease cohort variants Ig-1 WT and Ala82Asp, Fn3-7 WT and Trp16471Cys, Fn3-49 WT, Fn3-69 WT and the common variant Arg24947Cys, Fn3-90 WT and the common variant Ile27775Val, and Fn3-120 WT. WT domain denaturation curves are shown in black, missense variant domain curves are shown in grey. No denaturation curves were observed for Fn3-49 Val22232Glu, Fn3-90 Gly27849Val and Fn3-120 Arg31847Pro.

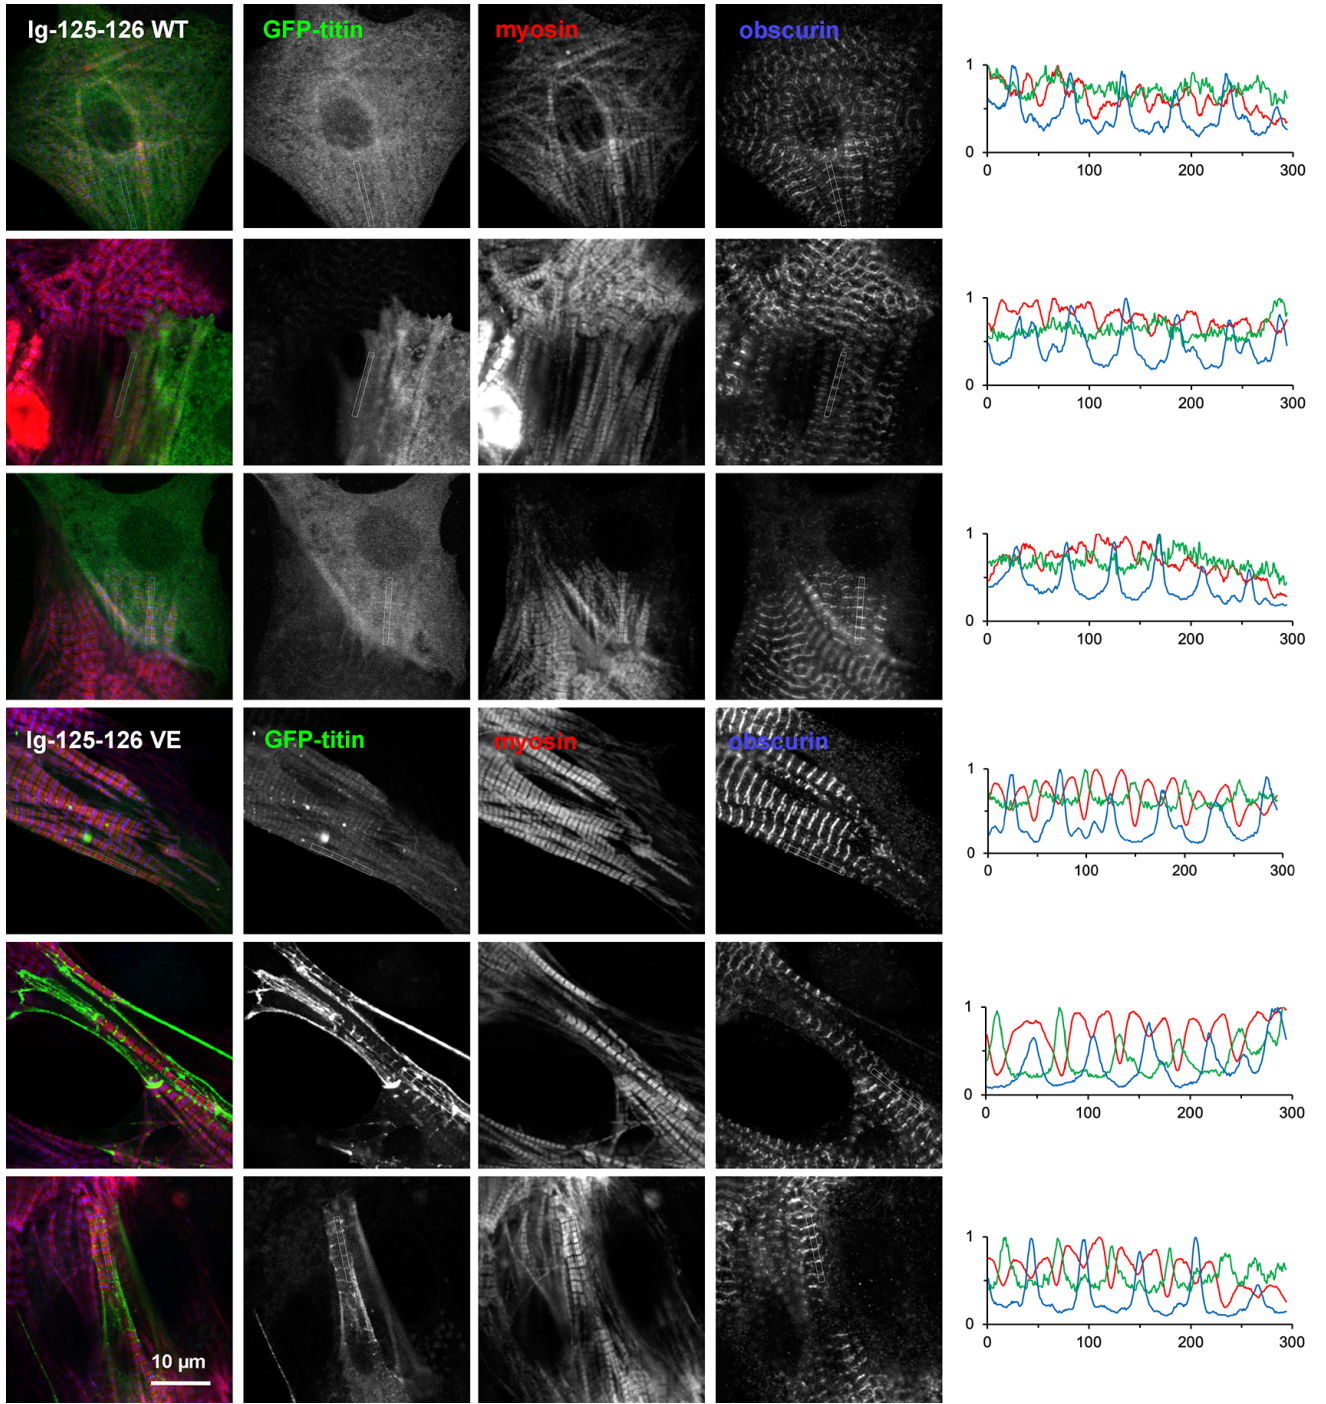



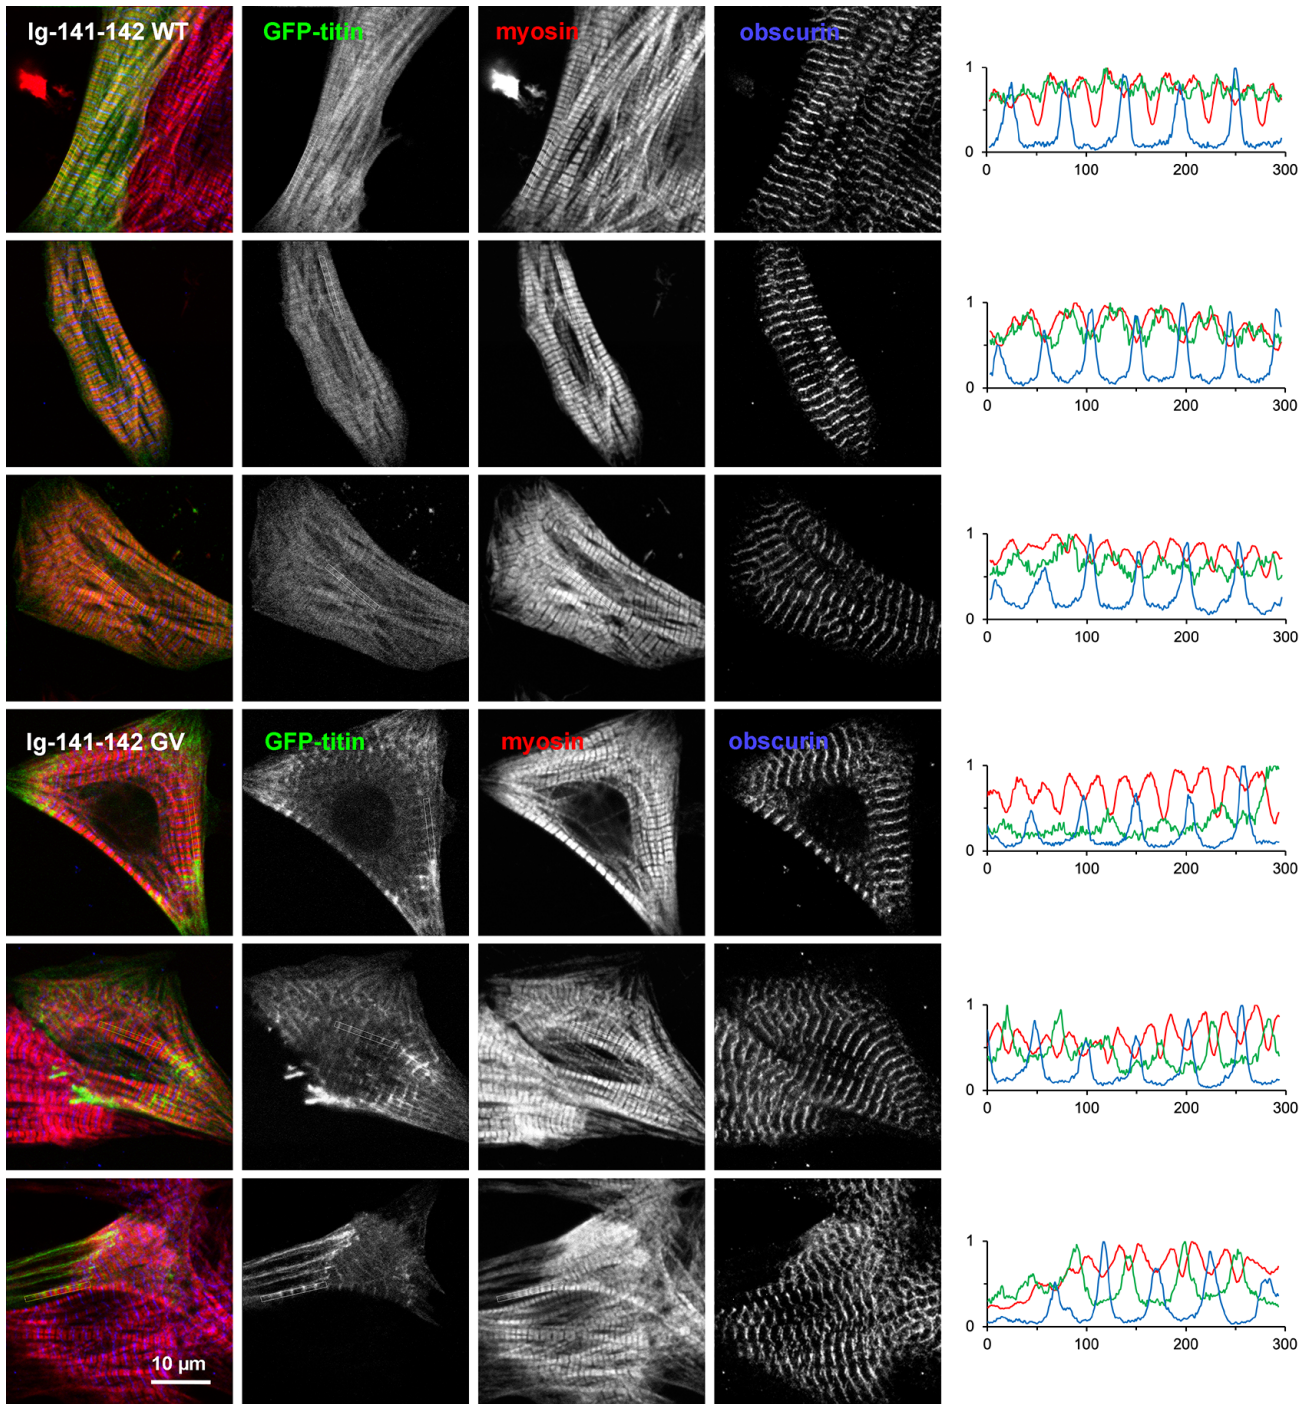

**Supplementary Figure 8 (this and previous page)**  
**Confocal immunofluorescence microscopy of neonatal rat cardiomyocytes expressing GFP-tagged titin Ig-125-126 WT and Val22232Glu, and Ig141-142 WT and Gly27849Val. Line scans of the boxed region show the localization of GFP-titin (green), myosin (red) and obscurin (blue).**

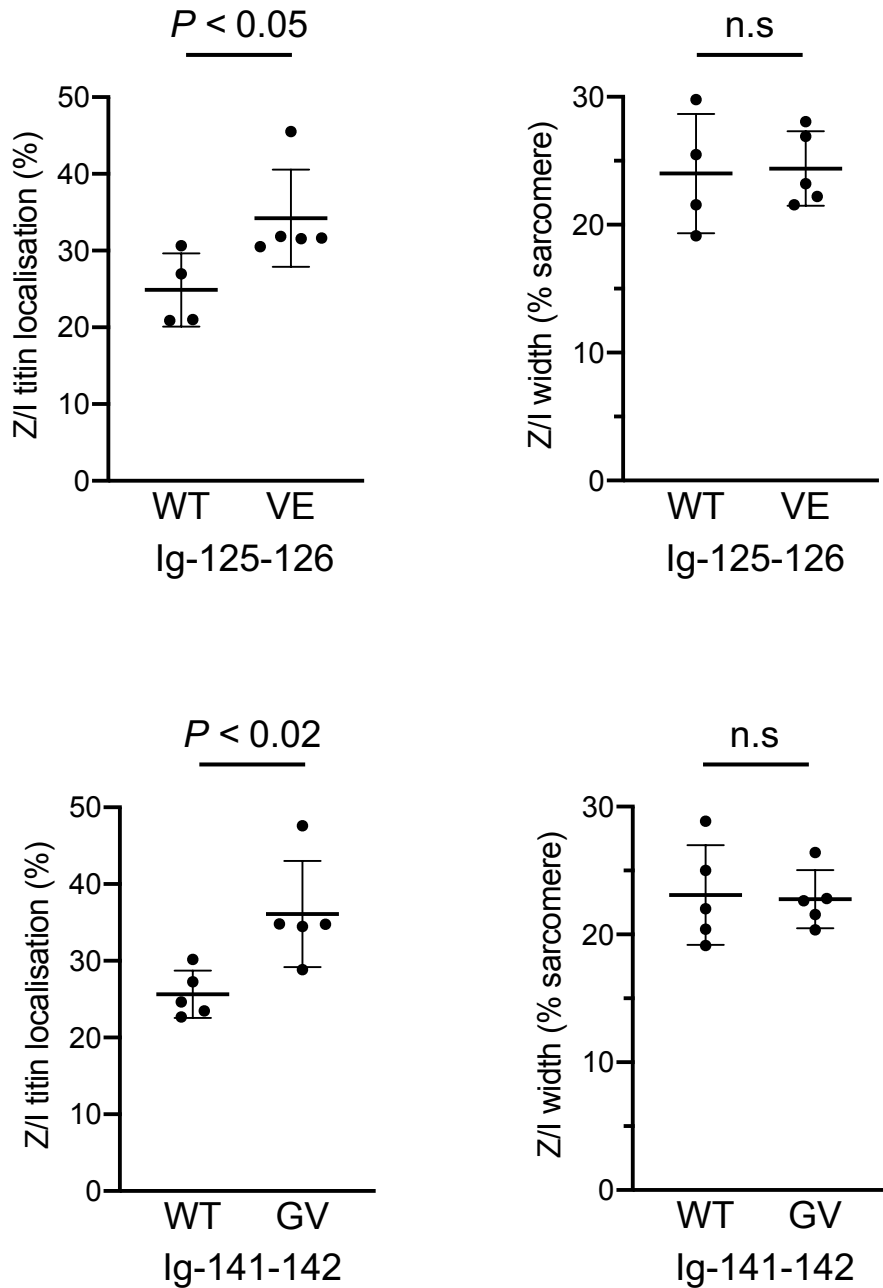

### Supplementary Figure 9

**Quantification of titin fragment localization to the Z-disk / I-band.** The amount of expressed titin fragments Ig-125-126 and Ig-141-142, and their variants Val22232Glu and Gly27849Val, respectively, that localized to the I-band / Z-disk region was quantified as a percentage of total GFP-titin signal in 5 different cells. The increase in GFP-titin signal in the I-band / Z-disk region in the cells expressing the variant titin fragments cannot be explained by an increase in the I-band / Z-disk region width. The students t-test was performed to measure differences between the groups. Mean and standard deviation plotted.

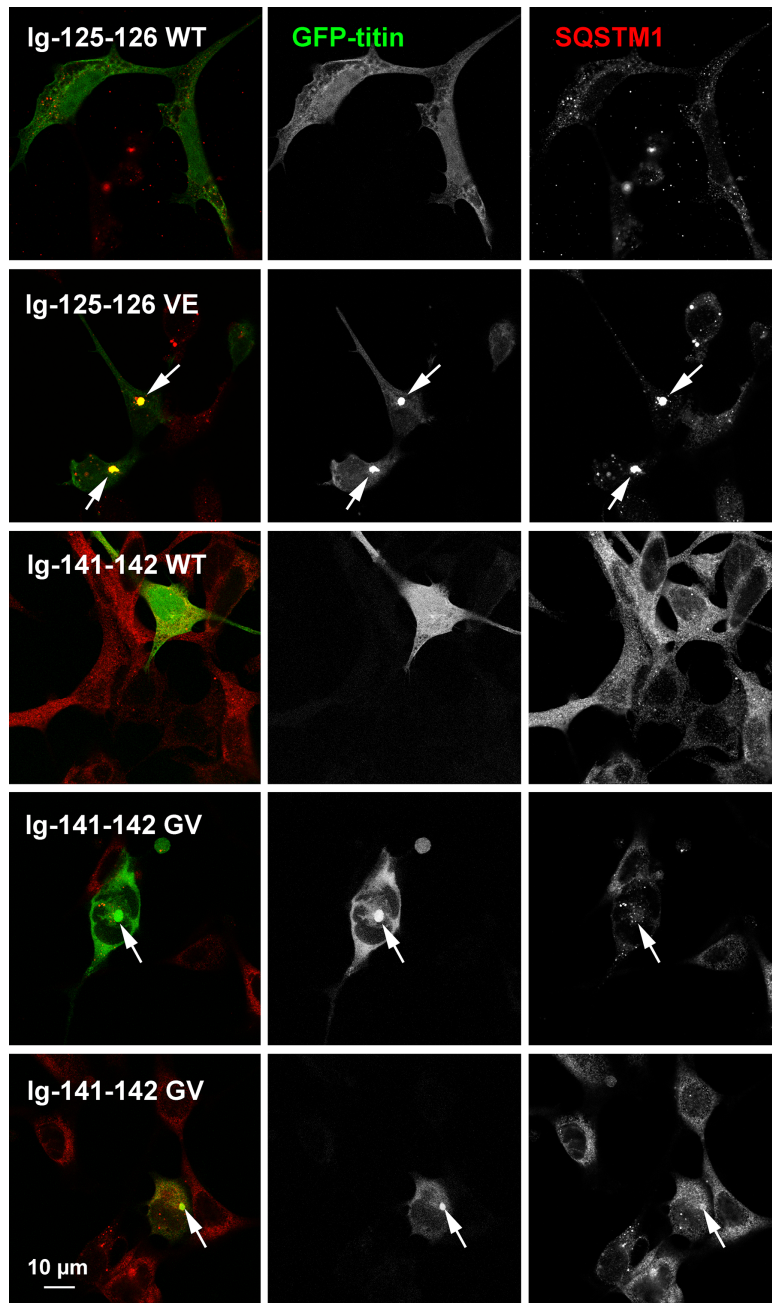

### Supplementary figure 10

**Confocal microscopic images showing expression of titin fragments in HEK293 cells.** GFP-tagged WT titin fragments Ig-125-126 and Ig-141-142, and their variants Val22232Glu and Gly27849Val, respectively, were transfected into HEK293 cells and their expression assessed. The localisations of the titin fragments were classified into three groups: diffuse expression, speckles without colocalization with SQSTM1 and speckles with colocalization with SQSTM1. Images shown here are examples from the most common classification for each titin fragment (Ig-125-126 WT: diffuse; Ig-125-126 VE: speckles colocalized with SQSTM1; Ig-141-142 WT: diffuse), with an example of Ig-141-142 Gly27849Val from speckles without colocalization with SQSTM1 and speckles with colocalization.

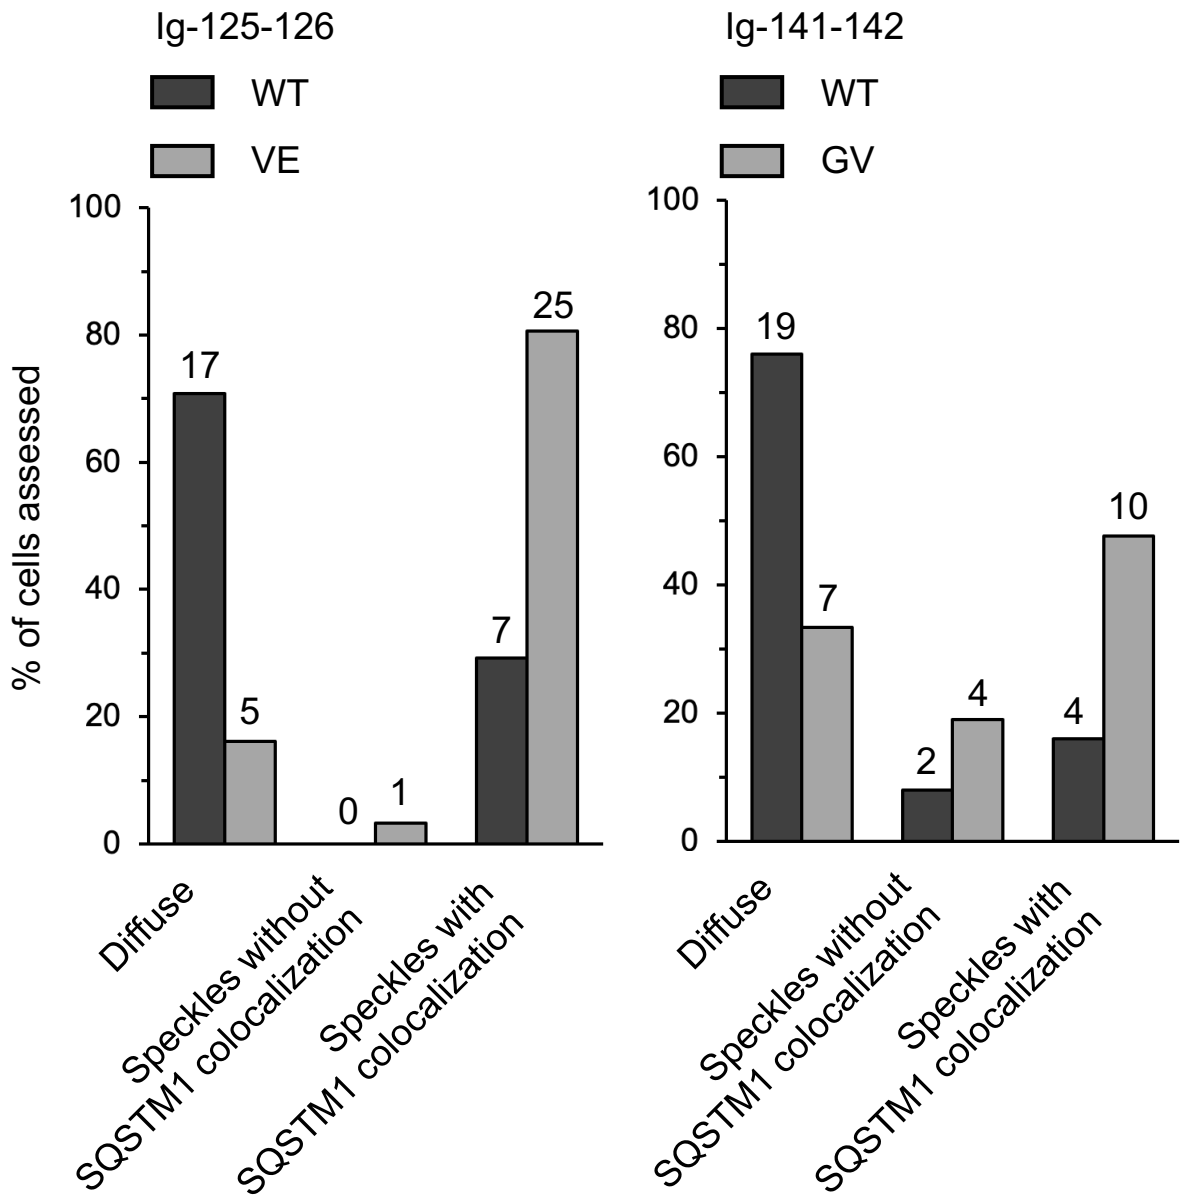

**Supplementary Figure 11**

**Bar chart showing classification of localisation of titin fragments expressed in HEK293 cells. Cell counts shown above each bar.**

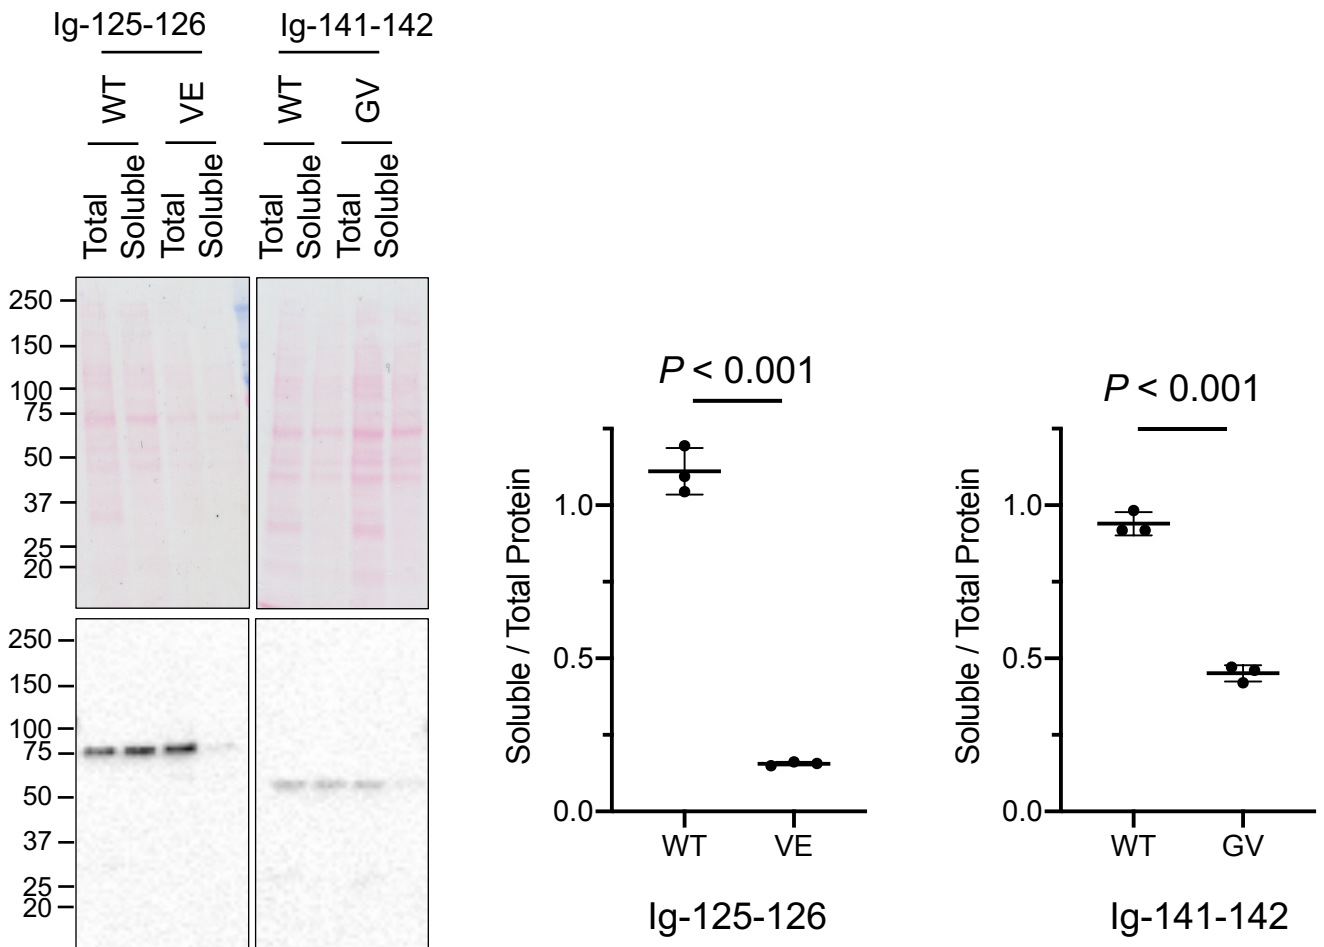

### Supplementary Figure 12

#### Assessment of solubility of WT and variant titin fragments expressed in HEK293 cells.

Left: Western blot of total and soluble fractions of HEK293 cells expressing GFP-tagged multidomain WT titin fragments Ig-125-126 and Ig-141-142, and their Val22232Glu (Fn3-49) and Gly27849Val (Fn3-90) variants, respectively, probed with anti-GFP antibody. Right: quantification of anti-GFP band density from three Western blots of three transfections of HEK293 cells with GFP-tagged multidomain titin fragments. The proportion of soluble titin may be slightly overestimated due to the smaller volume of the soluble fraction compared to the total sample. The students t-test was performed to measure differences between the groups. Mean and standard deviation plotted.

| Domain     | DNA   |        | Protein |        |
|------------|-------|--------|---------|--------|
|            | Start | Finish | Start   | Finish |
| Ig-1       | 226   | 525    | 1       | 100    |
| Ig-33      | 15160 | 15441  | 4979    | 5072   |
| Ig-87      | 41275 | 41553  | 13684   | 13776  |
| Fn3-4      | 48385 | 48687  | 16054   | 16154  |
| Fn3-7      | 49570 | 49875  | 16449   | 16550  |
| Fn3-12     | 51361 | 51660  | 17046   | 17145  |
| Fn3-20     | 54718 | 55038  | 18165   | 18271  |
| Ig-125-126 | 65575 | 67062  | 21859   | 22354  |
| Fn3-49     | 66679 | 66996  | 22152   | 22257  |
| Fn3-69     | 74944 | 75249  | 24907   | 25008  |
| Fn3-73     | 76435 | 76743  | 25404   | 25506  |
| Ig-141-142 | 83236 | 84355  | 27671   | 28055  |
| Fn3-90     | 83518 | 83820  | 27765   | 27865  |
| Fn3-119    | 95344 | 95643  | 31707   | 31806  |
| Fn3-120    | 95644 | 95949  | 31807   | 31908  |

### Supplementary Table 1

DNA and protein phasing for domains expressed in this study, corresponding to the Titin IC transcript (NM\_001267550).

| Patient         | Missense variant | Region         | Domain  | mCSM (kcal/mol) | CONDEL   | CADD Phred | GnomAD MAF |
|-----------------|------------------|----------------|---------|-----------------|----------|------------|------------|
| 1               | p.Ala82Asp       | Z-disk         | Ig-1    | -2.79           | 0.86 (D) | 23.2       | N/A        |
| 8               | p.Cys5054Arg     | I-band         | Ig-33   | -1.27           | 0.79 (D) | 22.1       | N/A        |
| 15 & 16         | p.Ala13715Glu    | I-band         | Ig-87   | -0.76           | 0.54 (D) | 23.3       | N/A        |
| 17              | p.Asn16133Lys    | A-band         | Fn3-4   | -0.15           | 0.80 (D) | 18.4       | N/A        |
| 18 & 19         | p.Trp16471Cys    | A-band         | Fn3-7   | -1.92           | 0.81 (D) | 24.7       | 0.000400   |
| 20 & 21         | p.Cys17051Arg    | A-band         | Fn3-12  | -1.44           | 0.50 (N) | 23.9       | 0.000004   |
| 22              | p.Val22232Glu    | A-band         | Fn3-49  | -2.82           | 0.64 (D) | 23.6       | N/A        |
| 23              | p.Arg25480Pro    | A-band         | Fn3-73  | -0.78           | 0.54 (D) | 25.0       | N/A        |
| 24              | p.Gly27849Val    | A-band         | Fn3-90  | -0.39           | 0.56 (D) | 24.2       | N/A        |
| 25 & 26         | p.Pro31732Leu    | A-band         | Fn3-119 | -0.84           | 0.66 (D) | 24.8       | 0.000012   |
| 27              | p.Arg31847Pro    | A-band         | Fn3-120 | -1.60           | 0.53 (D) | 25.1       | N/A        |
| 29              | p.Leu18237Pro    | A-band         | Fn3-20  | -0.69           | 0.46 (N) | 22.7       | 0.000633   |
| 30              | p.Trp34072Arg    | A / M Junction | Kinase  | -2.80           | 0.55 (D) | 24.6       | 0.000008   |
| Common Variants | p.Arg24947Cys    | A-band         | Fn3-69  | -2.04           | 0.52 (D) | 23.8       | 0.171451   |
|                 | p.Ile27775Val    | A-band         | Fn3-90  | -1.08           | 0.38 (N) | 22.0       | 0.352009   |

### Supplementary Table 4

#### *In silico* predictions for the effect of patient and common missense mutations.

mCSM calculates the predicted change in domain stability, with a change of below 0 to -2kCal/mol defined as destabilising and less than -2kCal/mol defined as highly destabilising. Positive values are defined as stabilising. A Condel score below 0.5 is classed as non-deleterious, above 0.5 classed as deleterious. The higher the CADD Phred score, the more deleterious the variant is predicted to be. Scores above 10 are the top 10% most deleterious variants in the genome, above 20 the most 1% deleterious etc.
