# Supplementary material for: Making sense of missense variants in TTN-related congenital myopathies
Source: Acta Neuropathol. 2021 Jan 15;141(3):431–53. doi: 10.1007/s00401-020-02257-0 (PMC7882473; doi:10.1007/s00401-020-02257-0)
Supplement: Supplementary file 1 — Supplementary file1 (XLSX 19 KB) [file 401_2020_2257_MOESM1_ESM.xlsx]

## Sheet: SupplementaryTable3
		TTN Mutation 1										TTN Mutation 2										TTN Mutation 3
	Patient	Nucleotide	Exon	Inher.	AA (IC Reference Sequence	Mutation Description	Region	Domain	Expressed in transcript?			Nucleotide	Exon	Inher.	AA (IC)	Mutation Description	Region	Domain	Expressed in transcript?			Nucleotide	LRG Exon	IC Exon	Inher.	AA (IC)	Mutation Description	Region	Domain	Expressed in transcript?			Cardio-myopathy	Other TTN	Other variants
									N2AB	N2A	N2B								N2AB	N2A	N2B									N2AB	N2A	N2B
	1	c.470C>A	3	Maternal	p.Ala82Asp	Missense	Z-disk	Ig1	Y	Y	Y	c.104646_104650del	359	Paternal	p.Arg34807Serfs*7	Frameshift	M-band	Between Ig-162 & Ig-163	Y	Y	Y												N	No	RYR
	2	c.2140C>T	12	Unknown	p.Gln639*	Nonsense	Z-disk	between Ig-2 and Ig-3	Y	Y	Y	c.83394_83395delGG	327	Unknown	p.Glu27723Aspfs*10	Frameshift	A-band	Ig-141	Y	Y	Y												Y	No
	3	c.4949_4953delTGAAA	27	Maternal	p.Met1575Serfs*6	Frameshift	Z-disk	Ig-7	Y	Y	Y	c.22186G>A	76	Paternal	p.Glu7321Lys*	Splicesite	I-band	between Ig-57 and Ig-58	Y	Y	N												N	No	PLEC
	4	c.4949_4953delTGAAA	27	Maternal	p.Met1575Serfs*6	Frameshift	Z-disk	Ig-7	Y	Y	Y	c.22186G>A	76	Paternal	p.Glu7321Lys*	Splicesite	I-band	between Ig-57 and Ig-58	Y	Y	N												N	No	PLEC
	5	c.6206C>A	28	Maternal	p.Ser1994*	Nonsense	Z / I Junction	Between Ig-9 and Ig-10	Y	Y	Y	c.105751C>T	359	Paternal	p.Gln35176*	Nonsense	M-band	Ig164	Y	Y	Y												Y	No
	6	c.14596+1_14597dup	51	Unknown	p.?	Duplication	I-band	Ig-31	Y	Y	N	c.16021C>T	55	Unknown	p.Arg5266*	Nonsense	I-band	Ig-36	Y	Y	N	c.31432+1_32072dup	116	115		p.?	Duplication	I-band	PEVK	Y	Y	N	N	Yes
	7	c.14596+1_14597dup	51	Unknown	p.?	Duplication	I-band	Ig-31	Y	Y	N	c.16021C>T	55	Unknown	p.Arg5266*	Nonsense	I-band	Ig-36	Y	Y	N	c.31432+1_32072dup	116	115		p.?	Duplication	I-band	PEVK	Y	Y	N	N	Yes
	8	c.15385T>C	52	Maternal	p.Cys5054Arg	Missense	I-band	Ig-33	Y	Y	N	c.74020delT	327	Paternal	p.Tyr24599Metfs*12	Frameshift	A-band	Fn3-66	Y	Y	Y												N	No
	9	c.19651+2T>A	68	Unknown	N/A	Splicesite	I-band	Between Ig-48 & Ig-49	Y	Y	N	c.60352G>T	304	Unknown	p.Gly20043*	Nonsense	A-band	Fn3-33	Y	Y	Y	c.57811C>G	296	295		p.Leu19196Val	Missense	A-band	Fn3-27	Y	Y	Y	N	Yes
	10	c.19651+2T>A	68	Unkonwn	N/A	Splicesite	I-band	Between Ig-48 & Ig-49	Y	Y	N	c.60352G>T	304	Unkonwn	p.Gly20043*	Nonsense	A-band	Fn3-33	Y	Y	Y	c.57811C>G	296	295		p.Leu19196Val	Missense	A-band	Fn3-27	Y	Y	Y	N	Yes
	11	c.24976C>T	86	Maternal	p.Gln8251*	Nonsense	I-band	Ig-67	Y	Y	N	c.106756+5G>A	360	Paternal	N/A	Splicesite	M-band	Between Ig-166 & Ig-167	Y	Y	Y	c.54366C>T	281	280		p.Ala18047Val	Missense	A-band	Ig-114	Y	Y	Y	N	Yes	NEB
	12	c.25229C>A	87	Unknown	p.Ser8335*	Nonsense	I-band	Ig-68	Y	Y	N	c.32920A>T	133	Unknown	p.Lys10899*	Nonsense	I-band	PEVK	Y	Y	N												N	No
	13	c.37309delG	179	Paternal	p.Ala12362Leufs*584	Frameshift	I-band	between Ig-86 and Ig-87	N	N	N	c.44506+1G>A	240	Maternal	N/A	Splicesite	I-band	Between Ig-98 & Ig-99	Y	Y	Y												N	No
	14	c.40783G>C	220	Not maternal	p.Val13520Leu	Splicesite	I-band	PEVK	Y	Y	Y	c.69646_69647insAAAAG	327	Maternal	p.Gly23141Glufs*37	Frameshift	A-band	Fn3-56	Y	Y	Y												Y	No
	15	c.41369C>A	226	Not maternal	p.Ala13715Glu	Missense	I-band	Ig-87	Y	Y	Y	c.33289C>T	136	Maternal	p.Arg11022*	Nonsense	I-band	PEVK	Y	Y	N												Y	No
	16	c.41369C>A	226	Not maternal	p.Ala13715Glu	Missense	I-band	Ig-87	Y	Y	Y	c.33289C>T	136	Maternal	p.Arg11022*	Nonsense	I-band	PEVK	Y	Y	N												Y	No
	17	c.48624C>A	259	Paternal	p.Asn16133Lys	Missense	A-band	Fn3-4	Y	Y	Y	c.16147C>T	55	Maternal	p.Arg5308*	Nonsense	I-band	Ig-36	Y	Y	N												N	No
	18	c.49638G>C	264	Unknown	p.Trp16471Cys	Missense	A-band	Fn3-7	Y	Y	Y	c.52234C>T	274	Unknown	p.Arg17337*	Nonsense	A-band	Ig-112	Y	Y	Y												Y	No
	19	c.49638G>C	264	Unknown	p.Trp16471Cys	Missense	A-band	Fn3-7	Y	Y	Y	c.52234C>T	274	Unknown	p.Arg17337*	Nonsense	A-band	Ig-112	Y	Y	Y												Y	No
	20	c.51376T>C	272	Trans	p.Cys17051Arg	Missense	A-band	Fn3-12	Y	Y	Y	c.98352_98362delATACCAAGAAG	353	Trans	p.Gln32711Leufs*22	Frameshift	A-band	Ig155	Y	Y	Y												Y	No
	21	c.51376T>C	272	Trans	p.Cys17051Arg	Missense	A-band	Fn3-12	Y	Y	Y	c.98352_98362delATACCAAGAAG	353	Trans	p.Gln32711Leufs*22	Frameshift	A-band	Ig155	Y	Y	Y												Y	No
	22	c.66920T>A	317	Maternal	p.Val22232Glu	Missense	A-band	Fn3-49	Y	Y	Y	c.102058delA	359	Paternal	p.Asn34020Thrfs*9	Frameshift	A / M Junction	Kinase	Y	Y	Y												Y	No
	23	c.76664G>C	327	Unknown	p.Arg25480Pro	Missense	A-band	Fn3-73	Y	Y	Y	c.44260C>T	239	Unknown	p.Arg14679*	Nonsense	I-band	Ig-98	Y	Y	Y												ND	No
	24	c.83771G>T	327	Paternal	p.Gly27849Val	Missense	A-band	Fn3-90	Y	Y	Y	c.63826C>T	307	Maternal	p.Arg21201*	Nonsense	A-band	Ig-123	Y	Y	Y	c.39691C>A	208	207	Paternal	p.Pro13156Thr	Missense	I-band	PEVK	Y	Y	N	Y	Yes
	25	c.95420C>T	344	Trans	p.Pro31732Leu	Missense	A-band	Fn3-119	Y	Y	Y	c.95420C>T	344	Trans	p.Pro31732Leu	Missense	A-band	Fn3-119	Y	Y	Y												N	No
	26	c.95420C>T	344	Trans	p.Pro31732Leu	Missense	A-band	Fn3-119	Y	Y	Y	c.95420C>T	344	Trans	p.Pro31732Leu	Missense	A-band	Fn3-119	Y	Y	Y												N	No
	27	c.95765G>C	345	Maternal	p.Arg31847Pro	Missense	A-band	Fn3-120	Y	Y	Y	c.16513C>T	56	Paternal	p.Arg5430*	Nonsense	I-band	Ig37	Y	Y	N	c.45089_45091del	246	245		p.Glu15030del	Deletion	I-band	Ig-101 - Ig-102	Y	Y	Y	Y	Yes
	28	c.97013_97014delCT	349	Maternal	p.Thr32263Serfs*5	Frameshift	A-band	Fn3-123	Y	Y	Y	c.106756+1G>A	360	Paternal	N/A	Splicesite	M-band	Between Ig-166 & Ig-167	Y	Y	Y												Y	No
	29	c.97546_97574del	350	Maternal	p.Asp32441Phefs*1	Frameshift	A-band	Fn3-123	Y	Y	Y	c.106584G>A	359	Paternal	p.Trp35453*	Nonsense	M-band	Ig-166	Y	Y	Y	c.54710T>C	283	282		p.Leu18237Pro	Missense	A-band	Fn3-20	Y	Y	Y	Y	Yes	MYBPC3
	30	c.102439T>C	359	Trans	p.Trp34072Arg	Missense	A / M Junction	Kinase	Y	Y	Y	c.23611C>T	82	Trans	p.Arg7796*	Nonsense	I-band	Ig-63	Y	Y	N												N	No	No
