# Supplementary material for: Making sense of missense variants in TTN-related congenital myopathies
Source: Acta Neuropathol. 2021 Jan 15;141(3):431–53. doi: 10.1007/s00401-020-02257-0 (PMC7882473; doi:10.1007/s00401-020-02257-0)
Supplement: Supplementary file 3 — Supplementary file3 (XLSX 82 KB) [file 401_2020_2257_MOESM3_ESM.xlsx]

## Sheet: Clinical features
Patient	SEX	AGE	A/D	DIAGNOSIS			ONSET	PREGNANCY	Fetal movements	Amniotic fluids	Contractures	Details	Other abnormalities		DELIVERY	Gestation	Presentation	Mode	Resuscitation	Details	Apgar	NEONATAL	Weight	Length	Head circumference	Hypotonia	Weakness	Details	Contractures	Details	Scoliosis	Fractures	Cleft palate	Dysmorphism	Details	Respiratory Involvement	Details	Ventilation	Details	Cardiac involvement	Details	Bulbar involvement	NGT	Other comments		FAMILY HISTORY	Cardiomyopathy	Detail	Sudden death
1	M	37	A	CFTD			Neonatal	Normal	Normal	Normal	No		No		ND	ND	ND	ND	No	NA	ND	NN	3560g	50cm	ND	Yes	Yes		Yes	Finger	No	No	No	No	NA	No	NA	No	NA	No	NA	Yes	Yes	ND		Yes	No	Brother with "enlarged heart due to sports", sister of father with arrythmia, father and mother both healthy	No
2	F	30	A	CNM			Neonatal	Normal	ND	ND	No		No		Normal	Term	Normal	Vaginal	No	NA	ND	NN	2890g	ND	ND	Yes	Yes		No	NA	No	No	No	No	NA	No	NA	No	NA	No	NA	Yes	No	ND		No	No	None	No
3	M	12	A	CNM			Infancy	Normal	Normal	Normal	No	NA	No		Normal	37+3	ND	Vaginal	No	NA	ND	Normal	3300g	ND	ND	No	No		No	NA	No	No	No	No	NA	No	developed later	No	NA	No	NA	No	No	ND		Yes	No	affected brother	Yes
4	M	10w	D	CNM			Neonatal	Normal	Normal	Normal	No	NA	No		Normal	Term	ND	Vaginal	No	NA	ND	Normal	3540g	ND	ND	No	No		No	NA	No	No	No	No	NA	Yes	After some weeks: tracheal tug, insufficiency	Yes	I+V	No	NA	Yes	Yes	ND		Yes	No	affected brother	Yes
5	F	3	A	CNM			Antenatal	NN	Reduced	Normal	No		No		Normal	34+2	ND	ND	No	NA	NA	NN	2070g	ND	ND	Yes	Yes		Yes	TEV; mild EFD, KFD and WFD	No	No	No	Yes	"Noonan-like"	Yes	ND	Yes	CPAP and intubation	Yes	Multiple congenital heart defects, including large outlet muscular VSD, atypical muscular VSDs and ASD	Yes	Yes	ND		Yes	Yes	Maternal grandfather suffered what was thought to be a “heart attack” at 35 years of age and died in his late 40s, having suffered from leukaemia requiring a bone marrow transplantation and apparently then went into cardiac failure.	No
6	M	14	A	MmD			Infancy	Normal	Normal	Normal	No	NA	ND	ND	Normal	ND	ND	ND	ND	ND	ND	Normal	ND	ND	ND	ND	ND		ND	ND	ND	ND	ND	ND	ND	ND	ND	ND	ND	ND	ND	ND	ND	ND		Yes	ND	ND	ND
7	F	12	A	MmD			Childhood	Normal	ND	ND	ND	NA	ND	ND	Normal	ND	ND	ND	ND	ND	ND	Normal	ND	ND	ND	ND	ND		ND	ND	ND	ND	ND	ND	ND	ND	ND	ND	ND	ND	ND	ND	ND	ND		Yes	ND	ND	ND
8	M	8	A	CFTD			Neonatal	Normal	Normal	Normal	No		No		Normal	Term	Normal	Vaginal	No	NA	ND	NN	ND	ND	ND	Yes	Yes		No	NA	No	No	No	No	NA	No	NA	No	NA	No	NA	Yes	No	ND		No	No	NA	No
9	F	23	A	CNM			Childhood	Normal	ND	ND	ND	ND	No		Normal	ND	ND	Vaginal	No	NA	ND	Normal	ND	ND	ND	ND	ND		ND	NA	ND	No	No	Yes	High arched palate, brachycephalic skull	No	NA	No	NA	No	NA	No	No	ND		Yes	ND	affected brother and sister	No
10	M	19	A	CNM			Childhood	Normal	ND	ND	ND	ND	No		Normal	ND	ND	Vaginal	No	NA	ND	Normal	ND	ND	ND	ND	ND		ND	NA	ND	No	No	Yes	High arched palate, brachycephalic skull	No	NA	No	NA	No	NA	No	No	ND		Yes	ND	affected brother and sister	No
11	M	14	A	CFTD			Childhood	Normal	Normal	Normal	No	NA	No		Normal	Term	Normal	Vaginal	No	NA	Normal	Normal	3600g	53cm	ND	No	No		No	NA	No	No	No	No	NA	No	NA	No	NA	No	NA	No	No	ND		No	No	NA	No
12	M	16	A	CFTD			Antenatal	NN	Reduced	ND	No	NA	ND		Normal	41	Normal	Vaginal	No	NA	ND	NN	3500g	53cm	34cm	Yes	ND		No	NA	No	No	No	No	NA	No	NA	No	NA	No	NA	No	No	ND		No	No	NA	No
13	M	11	A	CM			Infancy	Normal	Reduced	ND	No	NA	No		NN	38	Breech	LSCS	No	NA	ND	Normal	2950g	ND	ND	No	No		No	NA	No	No	No	Yes	Torticollis/plagiocephaly	No	NA	No	NA	No	NA	No	No	breastfeeding difficult; significant jaundice		Yes	Yes	Maternal grandfather and two maternal great-uncles dying from presumably cardiac causes in their 60s	No
14	F	24	A	CNM			Neonatal	Normal	ND	ND	No	NA	No		Normal	ND	ND	ND	No	NA	ND	NN	ND	ND	ND	Yes	Yes	Weak suck and cry	No	NA	No	No	No	No	NA	Yes	ND	No	NA	No	NA	Yes	No	Feeding difficulties		No	No	NA	No
15	M	21	A	T1P			Antenatal	ND	Reduced	ND	ND	ND	ND		NN (prolonged labour)	38	Normal	Vaginal	No	NA	ND	NN	ND	ND	ND	Yes	Yes	Weak suck	Yes	TEV	ND	ND	ND	ND	ND	No	NA	No	NA	No	NA	Yes	ND	Feeding difficulties; hyperbilirubinaemia		Yes	ND	affected sister; father sudden cardiac death age 35, paternal grandmother fatal MI age 56, paternal great uncle and paternal aunt died in their 60s from MI	Yes
16	F	13	A	ND			Antenatal	ND	Reduced	ND	ND	ND	ND		NN	Term	Breech	LSCS (emergency)	ND	ND	ND	NN	ND	ND	ND	Yes	ND		Yes	Arthrogryposis with TEV and adducted thumbs)	ND	ND	ND	ND	ND	No	NA	No	NA	ND	ND	Yes	Yes	Feeding difficulties		Yes	ND	affected brother; father sudden cardiac death age 35, paternal grandmother fatal MI age 56, paternal great unclea and paternal aunt died in their 60s from MI	Yes
17	M	19	A	MmD			Infancy	Normal	ND	ND	No	NA	No		NN (induced)	Term	Normal	Vaginal	No	NA	ND	NN	ND	ND	ND	Yes	Yes	Unable to latch and feed	No	NA	No	No	No	No	NA	No	NA	No	NA	No	NA	Yes	No	Feeding difficulties		No	No	NA	No
18	M	71	A	MmD			Childhood	Normal	ND	ND	No	NA	No		Normal	Term	ND	ND	ND	ND	ND	Normal	ND	ND	ND	ND	ND		ND	NA	ND	ND	ND	ND	ND	ND	ND	ND	ND	ND	ND	ND	ND	ND		Yes	Yes	Father died at the age of 69y of probable cardiomyopathy; Sister (born in 1960) with similar myopathic phenotype, died at the age of 54y of cardiorespiratory failure.	No
19	F	54	D	ND			Infancy	Normal	ND	ND	ND	NA	ND		Normal	ND	ND	ND	ND	ND	ND	ND	ND	ND	ND	ND	ND		ND	NA	No	No	ND	ND	ND	ND	ND	ND	ND	ND	ND	ND	ND	ND		Yes	Yes	Father died at the age of 69y of probable cardiomyopathy; older sister (born in 1948) with similar myopathic phenotype, currently still alive.	No
20	F	50	A	MmD			Neonatal	ND	ND	ND	No	NA	ND		ND	ND	ND	ND	ND	ND	ND	NN	ND	ND	ND	Yes	Yes	axial	No	NA	Yes	No	ND	No	NA	No	NA	No	NA	No	NA	No	No	NA		Yes	Yes	One similarly affected brother developed a dilated cardiomyopathy from the age of 30	No
21	M	47	A	MmD			Neonatal	ND	ND	ND	No	NA	ND		ND	ND	ND	ND	ND	ND	ND	NN	ND	ND	ND	Yes	Yes	axial	No	NA	ND	No		No	NA	No	NA	No	NA	No	NA	No	No	NA		Yes	Yes	One similarly affected brother developed a dilated cardiomyopathy from the age of 30	No
22	M	18	A	MmD			Neonatal	ND	ND	ND	ND	NA	ND		Normal	ND	ND	ND	ND	ND	ND	NN	ND	ND	ND	ND	ND		No	NA	No	ND	ND	ND	Webbed and short neck, apparent hypertelorism	No	NA	No	NA	Yes	ASD, VSD (surgical repair at 1y)	ND	ND	ND		No	No	No	No
23	M	3m	D	CNM			Antenatal	NN	ND	ND	ND		ND		ND	ND	ND	ND	ND	ND	ND	NN	ND	ND	ND	Yes	Yes		ND	NA	ND	ND	ND	No	NA	Yes	ND	ND	ND	ND	ND	Yes	ND	Feeding difficulties		ND	ND	ND	ND
24	M	9	A	MmD			Neonatal	Normal	Normal	Oligohydramnios	Yes	4th-5th finger contractures	Yes	abnormal heart rate, bilateral pes talus	NN	41	Cephalic	LSCS (emergency)	Yes	Mask ventilation	3/8/9	NN	3400g	51cm	36.5cm	Yes	Yes	reduced antigravity movements	Yes	4th and 5th finger; bilateral talus deformities	No	No	No	Yes	unilateral single palmar crease, micrognathia, high arched palate; single umbilical artery	No	NA	No	NA	Yes	large ASD with associated pulmonary hypertension (diagnosed at 6m because of signs of cardiac failure; surgically corrected)	Yes	No	Feeding difficulties		No	No	NA	No
25	M	31	A	CM			Infancy	Normal	ND	ND	ND	NA	ND		Normal	ND	ND	ND	ND	ND	ND	Normal	ND	ND	ND	ND	ND		ND	NA	ND	ND	ND	ND	NA	ND	ND	ND	ND	ND	ND	ND	ND	ND		Yes	No	NA	No
26	F	25	A	CM			Infancy	Normal	ND	ND	ND	NA	ND	Poor head control	Normal	ND	ND	ND	ND	ND	ND	Normal	ND	ND	ND	ND	ND		ND	NA	ND	ND	ND	ND	ND	ND	ND	ND	ND	ND	ND	ND	ND	ND		Yes	No	NA	No
27	F	27	A	MmD			Antenatal	NN	Reduced	Normal	No	NA	ND	NA	NN	39	Normal	Vaginal + VE	No	NA	ND	NN	2435g	ND	ND	Yes	Yes		Yes	Achilles tendon contractures surgically corrected at 1y. Legs in fixed position folded upwards at birth	No	No	No	No	NA	No	NA	No	NA	No	NA	Yes	Yes	Feeding difficulties		Yes	No	NA	No
28	M	10	A	CM			Neonatal	Normal	Normal	Normal	No	NA	No	NA	Normal	38	Normal	Vaginal	No	NA	ND	Normal	2370g	ND	ND	No	No		No	NA	No	No	No	Yes	Low set ears, abnormal facies, webbed neck; wide spaced nipples, single palmar creases; undescended testes; over-riding toes	Yes	ND	No	Stridor, laryngomalacia; probable aspiration in first days of life	No	NA	Yes	Yes	Feeding difficulties		No	No	NA	No
29	M	32	A	CNM			Neonatal	NN	Reduced	ND	Yes	Elbows, wrists, LFF, TA	Yes	"Noonan-like" features. Ptosis, down slanting palpebral fissures, low set posteriorly rotated ears with abnormal helices, webbed neck, widely spaced nipples, pectus carinatum, tapering fingers with prominent fetal pads . Spinal rigidity	Normal	Term	Normal	Vaginal	No	NA	ND	NN	3130g	49cm	33.9cm	Yes	Yes	reduced antigravity movements	No	NA (contractures not noticed until childhood)	No	No	No	Yes	"Noonan-like" features. Ptosis, down slanting palpebral fissures, low set posteriorly rotated ears with abnormal helices, webbed neck, widely spaced nipples, pectus carinatum, tapering fingers with prominent fetal pads . Spinal rigidity	Yes	ND	No	NA	Yes	LV non-compaction	Yes	No	Feeding difficulties		Yes	Yes	Older brother died early in infancy, probably from cardiorespiratory causes.	Yes
30	F	32	A	CM			Antenatal	NN	Reduced	ND	Yes	NA	Yes	Fractured claviculae, L humerus, L femur, and bilateral hip subluxation	Normal	Term	Cephalic	Vaginal	No	NA	ND	NN	3200g	ND	ND	Yes	Yes		Yes	Arthrogryposis with congenital torticollis	Yes	Yes	No	Yes	Clinodactyly	No	NA	ND	ND	No	NA	No	No	NA		No	No	NA	No
[truncated: 100 more columns]

## Sheet: Investigations
Nr	Patient	SEX	AGE (RIP)	A/D	DIAGNOSIS		CK levels	Details		EMG	Details		NCS	Detail		Brain and/or Spine MRI	Detail		Muscle imaging	Detail
1	1	M	37	A	CFTD		ND	NA		ND	NA		ND	NA		ND	NA		NN	MRI: Severe fatty infiltration affecting the axial and limb girdle muscles
2	2	F	31	A	CNM		Normal	ND		NN	Myopathic		Normal	NA		NN	Mild bilateral ventricular dilatation		NN	MR: NA
7	3	M	12	A	CNM		ND	ND		NN	Small motor and normal sensory responses; unable to sit still for repeated tests		Normal	ND		ND	NA		ND	NA
8	4	M	10w	D	CNM		ND	ND		ND	NA		ND	NA		ND	NA		ND	NA
3	5	F	4	A	CNM		Normal	155 IU/l		NN	Normal sensory studies, common peroneal CMAPS from EDB slightly small, normal motor unit action potentials. No myopathic features.		Normal	ND		NN	Slight delay in myelination, thin corpus callosum and prominent CSF spaces. The cord termination is slightly low (L3/4). Some interval white matter volume loss on follow-up MRI after 6 months.		ND	NA
26	6		14	A	MmD		Normal	67 IU/l		ND	NA		ND	NA		ND	NA		ND	NA
27	7		12	A	MmD		Increased	299 IU/l		ND	NA		ND	NA		ND	NA		Normal	ND
4	8	M	8	A	CFTD		Increased	500 IU/l		ND			ND	ND		ND	NA		ND	NA
5	9	F	23	A	CNM		Increased	ND		ND			ND	ND		ND	NA		ND	NA
6	10	M	19	A	CNM		Normal	ND		ND			ND	ND		ND	NA		ND	NA
9	11	M	14	A	CFTD		ND	ND		ND	NA		ND	NA		ND	NA		NN	MRI: "Rimming" around vastus intermedius and tibialis anterior
10	12	M	16	A	CFTD		Normal	143 IU/l		Normal	NA		Normal	NA		ND	NA		ND	NA
11	13	M	11	A	CM		Normal	ND		NN	Mildly myopathic. RNS normal.		Normal	ND		ND	NA		NN	MRI: Fatty atrophy of the tensor fascia lata and rectus femoris muscles, as well as the vastus lateralis and intermedius muscles in the anterior compartment, with marked fatty atrophy. Similar changes are see in to a lesser extent in the semimembranosus and semitendinosus muscles in the posterior compartments. The findings are slightly more established on the right on the left. Bilateral almost s…
12	14	F	24	A	CNM		Normal	ND		NN	Mixed pattern with previous evidence of NMJ disturbance		NN	Mixed pattern with previous evidence of NMJ disturbance		ND	NA		ND	NA
13	15	M	21	A	T1P		ND	ND		Normal	no abnormalities		Normal	no abnormalities		ND	NA		NN	US: increased echogenicity of rectus femoris, hamstrings, tibialis anterior, biceps. Moderately increased echogenicity of vastus lateralis and triceps. Atrophy of the triceps.
14	16	F	13	A	ND		ND	ND		ND	NA		ND	NA		ND	NA		NN	US: increased echogenicity of rectus femoris, hamstrings, tibialis anterior, biceps. Moderately increased echogenicity of vastus lateralis and triceps. Atrophy of the triceps.
15	17	M	19	A	MmD		Normal	39 IU/l		Normal	NCS were normal; Needle EMG done at age 5y showed normal units in the R vastus lateralis and tibialis anterior		Normal	Motor & sensory nerve conductions of R arm and leg were normal		ND			ND	NA
16	18	M	71	A	MmD		Normal	ND		NN	myopathic		Normal	no neurogenic changes		ND	NA		NN	CT: Adipous replacement predominantly in paravertebral muscles, quadriceps (relative sparing of RF) and semitendinosous.
	19	F	54	D	ND		ND	ND		ND	NA		ND	NA		ND	NA		ND	NA
17	20	F	50	A	CM		Normal	ND		ND	NA		ND	NA		ND	NA		NN	MRI: (attached in email)
17b	21	M	47	A			Normal	ND		ND	NA		ND	NA		ND	NA		No
18	22	M	18	A	CM		Normal	195 IU/l		ND	NA		ND	NA		ND	NA		ND	NA
19	23	M	3m	D	CNM		Normal	ND		ND	NA		ND	NA		ND	NA		ND	NA
20	24	M	9	A	MmD		Normal	62 IU/l		Normal	NA		Normal	NA		NN	Mild white matter immaturity		NN	MRI: Diffuse anomalies in muscle signal and very discreet generalised hyperintense signal in STIR. Atrophy and fat infiltration affecting mostly the gluteal muscles and hamstrings. Relative sparing of the quadriceps (only vastus medialis mildly and distally affected).
21	25	M	31	A	CM		Normal	ND		NN	myopathic, with slightly diminished polyphasic amplitudes		ND	ND		ND	NA		ND	NA
21b	26	F	25	A	CM		Normal	ND		NN	myopathic		ND	ND		ND	NA		ND	NA
22	27	F	27	A	MmD		Normal	83 IU/l		ND	NA		ND	NA		ND			ND	NA
23	28	M	10	A	CM		Normal	ND		NN	The left vastus medialis muscle shows an increased number of polyphasic motor units action potentials, however, the EMG studies do not show conclusive evidence of myopathic pattern.		Normal	The nerve conduction studies show fairly preserved motor and sensory responses. There is no evidence of peripheral neuropathy.		NN	Normal intracranial appearances and normal appearances of the spinal cord with a patent spinal canal. Multiple vertebral segmentation anomalies are noted ( There is evidence of fusion of the posterior elements at C6-C7, T2-T3, T4-T6 and T8-T10. There is also fusion of the lower thoracic vertebral bodies with rudimentary discs. Counting from above, there appear to be four lumbar vertebrae.)		NN	MRI: There appears to be marked fatty infiltration of the hamstrings as well as the posterior compartment of the calf without significant muscular oedema demonstrated on the STIR images. Fixed flexion deformities bilaterally. Both hamstring tendons are stretched and thickened within the superficial popliteal region.
24	29	M	32	A	CNM		ND	ND		ND	NA		ND	NA		ND	NA		NN	Thigh: Biceps femoris long head and vasti more affected, relative sparing of sartorius, gracilis, rectus femoris Calf: Peroneus longus and medial gastroc most affected, lateral gastroc less affected L soleus also involved, relative sparing of tibialis anterior, extensor digitorum long
25	30	F	29	A	CM		Normal	63 IU/l		NN	myopathic		Normal	no neurogenic changes		Normal	ND		NN	MRI: Fibro-adipose replacement of the posterior thigh muscles (hamstrings), severe in biceps and semimembranous with relative sparement of semitendinosus. Moderate changes in vastus lateralis, gluteus, adductor muscles

## Sheet: Muscle biopsy
Patient	SEX	AGE (RIP)	A/D	DIAGNOSIS		PRINCIPAL HISTOPATHOLOGICAL DIAGNOSIS		NUMBER OF BIOPSIES		SITE	Age		LIGHT MICROSCOPY	CFTD/increased variability in fibre size	T1P	Internalized nuclei	Percentage	Central	Multiple	Connective tissue	Fat	Necrosis	Central cores	Multi-minicores	Unevenness	Details	Nemaline rods	Other features		IMMUNOHISTOCHEMISTRY	Detail		EM	Description	Cores	Details	Rods	Central nuclei	Other abnormalities	Details
1	M	37	A	CFTD		Congenital Fibre Type Disproportion		1		ND	2y			Yes	ND	No	NA	NA	NA	Normal	No	No	No	No	No	NA	No	ND			Type 1 fibre predominance		NN		Yes	NA	No	No	No	NA
2	F	31	A	CNM		Centronuclear Myopathy		1		ND	ND			ND	ND	Yes	ND	Yes	Yes	ND	ND	ND	ND	ND	Yes	Peripheral dark rims on COX and NADH	No	ND			ND		ND		NA	NA	NA	NA	NA	NA
3	M	12	A	CNM		Centronuclear Myopathy		1		Quadriceps	ND			Yes	ND	Yes	ND	Yes	No	Normal	No	No	Yes	No	Yes	Some pale peripheral haloes	No	ND		ND	NA		NN		Yes	Minicore areas with myofibrillar disruption	No	Yes	ND	NA
4	M	10w	D	CNM		Centronuclear Myopathy		1		Quadriceps	ND			Yes	ND	Yes	ND	Yes	No	Normal	No	No	Yes	No	Yes	Some pale peripheral haloes	No	ND			laminin alpha2: nerve positive, suggestion of grouping as in a neurogenic disorder		NN		Yes	Core-like and minicore areas with myofibrillar disruption	No	Yes	Yes	mitochondrial aggregates
5	F	4	A	CNM		Centronuclear Myopathy		1		R vastus lateralis	ND			Yes	ND	Yes	0.4	Yes	No	Increased	No	No	No	No	Yes	Irregular NADH staining, areas of sarcoplasmic clearing	No	ND			moderate-severe variation in fibre size, type 1 fibre predominance (exacerbated by prominent type 2 atrophy)		ND		NA	NA	NA	NA	NA	NA
6		3	A	MmD		Multi-minicore Disease		1		ND	ND		myopathic changes with central nuclei, type 1 predominance. Electron microscopy demonstrated (mini)cores, internal nuclei, Z-band disruption, swollen mitochondrion. Normal ATP production capacity.	No	Yes	Yes	ND	Yes	ND	ND	ND	ND	Yes	Yes	ND	myopathic changes with central nuclei, type 1 predominance. Electron microscopy demonstrated (mini)cores, internal nuclei, Z-band disruption, swollen mitochondrion. Normal ATP production capacity.	No			Normal	ND		Yes	EM demonstrated (mini)cores, internal nuclei, Z-band disruption, swollen mitochondrion.	Yes	ND	No	Yes	Yes	loss of mitochondrion with elongated appearance, slight diminished ATP production capacity.
7		11	A	MmD		Multi-minicore Disease		1		ND	ND		myopathic changes with central nuclei, type 1 predominance. Electron microscopy demonstrated (mini)cores, internal nuclei, Z-band disruption, swollen mitochondrion. Normal ATP production capacity.	No	Yes	Yes	ND	Yes	ND	ND	ND	ND	Yes	Yes	ND	myopathic changes with central nuclei, type 1 predominance. Electron microscopy demonstrated (mini)cores, internal nuclei, Z-band disruption, swollen mitochondrion. Normal ATP production capacity.	No			Normal	ND		Yes	EM demonstrated (mini)cores, internal nuclei, Z-band disruption, swollen mitochondrion.	Yes	ND	No	Yes	Yes	(mini)cores, internal nuclei, Z-band disruption, swollen mitochondrion. Normal ATP production capacity.
8	M	8	A	CFTD		Congenital Fibre Type Disproportion		1		L vastus lateralis	ND		variability in fiber size	Yes	ND	No	NA	NA	NA	Increased (mild)	No	No	No	No	Yes	NA	No	ND			Standard panel was normal		ND		NA	NA	NA	NA	NA	NA
9	F	23	A	CNM		Centronuclear Myopathy / CM		1		vastus lateralis	ND			Yes	Yes	Yes	0.3	Yes	No	Increased (mild)	Yes	No	No	Yes	Yes	core-like	No	ND		dystrophin, alpha-, beta-, gamma-, delta-sarkoglycan, merosin, dysferlin, desmin, alpha-dystroglykan, emerin, caveolin 3, collagen IV/ VI, MHC I, CD3, CD68, MAC	Some increase of anti-dysferlin, even more anti-desmin central in the muscle fibres		ND		NA	NA	NA	NA	NA	NA
10	M	19	A	CNM		Centronuclear Myopathy / CM		1		vastus lateralis	ND			Yes	Yes	Yes	0.3	Yes	No	Increased (mild)	Yes	No	No	Yes	Yes	core-like	No	ND		dystrophin, alpha-, beta-, gamma-, delta-sarkoglycan, merosin, dysferlin, desmin, alpha-dystroglykan, emerin, caveolin 3, collagen IV/ VI, MHC I, CD3, CD68, MAC	Some increase of anti-dysferlin, even more anti-desmin central in the muscle fibres		ND		NA	NA	NA	NA	NA	NA
11	M	14	A	CFTD		Congenital Fibre Type Disproportion		1		ND	ND		fibre size variability	Yes	ND	ND	ND	ND	ND	ND	ND	ND	ND	ND	ND	NA	No	ND		ND	ND		ND		NA	NA	NA	NA	NA	NA
12	M	16	A	CFTD		Congenital Fibre Type Disproportion		1		ND	9m		fibre size variability	Yes	ND	No	NA	NA	NA	Normal	No	No	No	No	ND	NA	No	ND			Normal		ND		NA	NA	NA	NA	NA	NA
13	M	11	A	CFTD		Congenital Fibre Type Disproportion		1		ND	ND		fibre size variability	Yes	ND	No	NA	NA	NA	Increased (marked)	No	No	No	Yes	Yes	core-like	No	ND		ND	ND		ND		NA	NA	NA	NA	NA	NA
14	F	24	A	CNM		Centronuclear Myopathy		1		ND	ND			ND	ND	Yes	ND	Yes	ND	ND	ND	ND	ND	ND	Yes	Peripheral dark rims in COX and NADH	No	ND		ND	ND		ND		NA	NA	NA	NA	NA	NA
15	M	21	A	T1P		Type 1 fibre predominance		1		Vastus lateralis	ND			No	Yes	ND	ND	ND	ND	ND	ND	ND	ND	ND	ND	ND	ND	Normal respiratory chain studies		ND			ND		NA	NA	NA	NA	NA	NA
16	F	13	A	ND		ND		0		NA	ND			No	Yes	ND	ND	ND	ND	ND	ND	ND	ND	ND	ND	ND	ND			ND			ND		NA	NA	NA	NA	NA	NA
17	M	19	A	MmD		Multi-minicore Disease		1		Vastus lateralis	6y		Biopsy at age 6; moderate diffuse punctate staining on SDH/NADH consistent with multiminicore disease; multifocal central clearing on PAS and ATPase small number of perivascular lymphocytes noted multifocally; mildly increased central nucleation (~4%); type 1 fiber predominant	No	Yes	Yes (very mild)	0.04	Yes	No	Normal	Normal	No	No	Yes	Yes	Multiple "moth-eaten" fibres	No	ND		ND	NA		Yes	Myofibrils showing multifocal disarray within single muscle fibers. No evidence of hypercontraction, I-band loss, A-band loss, ring fibers, cores, filamentous bodies, concentric laminated whorls.	Yes	Myofibrils showing multifocal disarray within single muscle fibers. No evidence of hypercontraction, I-band loss, A-band loss, ring fibers, cores, filamentous bodies, concentric laminated whorls.	No	No	ND	NA
18	M	71	A	MmD		Multi-minicore Disease		1		ND	ND			Yes	ND	Yes	ND	Yes	ND	Normal	Normal	ND	No	Yes	ND	small minicores	ND	increased fibre size variability		NN	type 1 predominace, normal IHC for Dysf, SGC, capn3, dys, des, col6, fkrp		NN	ND	Yes	Myofibrillar disorganization suggestive of MmD	ND	ND	ND	NA
19	F	54	D	ND		ND		0		NA	NA		NA	NA	NA	NA	NA	NA	NA	NA	NA	NA	NA	NA	NA	NA	NA	NA		NA	NA		NA	NA	NA	NA	NA	NA	NA	NA
20	F	50	A	MmD		Multi-minicore Disease		1		ND	ND		ND	ND	ND	ND	ND	No	ND	No	Yes	No	No	Yes	ND	ND	No	ND		ND	NA		ND	NA	NA	NA	NA	NA	NA	NA
21	M	47	A	MmD		Multi-minicore Disease		1		ND	ND		ND	ND	ND	Yes	0.06	No	No	No	No	No	ND	Yes	ND	ND	No	ND		ND	NA		ND	NA	NA	NA	NA	NA	NA	NA
22				MmD		Multi-minicore Disease		1		ND	12y		Minicores; Central nuclei; Central basophilic and central dark oxidative areas; type 1 uniformity	No	Yes	Yes	ND	Yes	Yes	ND	ND	ND	ND	Yes	ND	Central basophilic and central dark oxidative areas	ND	ND		ND	NA		ND	NA	NA	NA	NA	NA	NA
23	M	3m	D	CNM		Centronuclear Myopathy		1		Quadriceps	ND			ND	ND	Yes	ND	ND	ND	ND	ND	ND	ND	ND	ND	NA	ND	ND		ND	NA		ND	NA	NA	NA	NA	NA	NA	NA
24	M	9	A	MmD		Multi-minicore Disease		1		Vastus lateralis	ND			Yes	Yes	Yes	ND	ND	ND	Normal	Increased (mild)	No	Yes (discrete)	Yes (discrete)	Yes	Irregular staining with enzymatic NADH; discrete cores (both multi-minicore and central)	No	fibre size variability (atrophic and predominant type 1 fibres)			Type 1 predominance		NN		Yes	Myofibrillar disorganisation with multiple core-like abnormalities)	No	ND	ND	NA
25	M	31	A	CM		Congenital myopathy with cytoplasmic inclusion bodies		1		Quadriceps	ND		Myopathic changes and neurogenic atrophy with reinnervation. Cytoplasmatic inclusion bodies.	ND	ND	ND	ND	ND	ND	ND	ND	ND	ND	ND	ND	ND	ND	Cytoplasmic inclusion bodies ("Mallory-body-like") with sarcomeric disruption and abnormal desmin accumulation. Associated neurogenic features.		ND	ND		NN	Subsarcolemmal cytoplasmic bodies ("Mallory body-like), myofibrillar architecture disruption with abnormal desmin accumulation.	ND	ND	ND	ND	ND	NA
26	F	25	A	CM		Congenital myopathy with cytoplasmic inclusion bodies		1		Quadriceps	ND		Multiple muscle fibres with cytoplasmic bodies below the sarcolemma but also centrally.	ND	ND	ND	ND	ND	ND	ND	ND	ND	ND	ND	ND	ND	ND	ND		ND	ND		NN	"Mallory-like bodies"	ND	ND	ND	ND	NA	NA
27	F	27	A	MmD		Multi-minicore Disease		1		ND	ND		ND	No	Yes	No	NA	NA	NA	Normal	Normal	No	Yes	Yes	No	Cores not in all cells; in some cells more than one, some centrally, some at the periphery.	No	ND		NN	Type 1 predominance (100% type 1), otherwise normal		ND	NA	NA	NA	NA	NA	NA	NA
28	M	10	A	MmD		Multi-minicore Disease		1		Vastus lateralis	ND		ND	No	ND	Yes	0.06	ND	ND	Increased	Normal	No	No	No	Yes	Irregular staining on NADH, SDH and COX, more in keeping with minicore-like structures.	No	ND		NN	Type I predominance with scattered type II fibres		ND	NA	NA	NA	NA	NA	NA	NA
29	M	32	A	CNM		Centronuclear Myopathy		2		Quadriceps	ND		First muscle biopsy at 8y of age: Type 1 predominance and internal nuclei in most fibres. Biopsy 1 myopathy with cores and rods. Biopsy 2 CNM.	No	Yes	Yes	ND	Yes	Yes	Increased	No	No	No	Yes	Yes	Increased nuclei, cores and rods, and increase in connective tissue more prominent on 2nd muscle biopsy.	Yes	Prominent "lobulated fibres"		ND	Biopsy 2 report- numerous enlarged clusters of densely packed mitochondria, consistent with lobulated fibres, and occasional minor foci of disruption in myofibrillary architecture		Yes	ND	ND	Biopsy 2 report- numerous enlarged clusters of densely packed mitochondria, consistent with lobulated fibres, and occasional minor foci of disruption in myofibrillary architecture	No	ND	ND	ND
30	F	29	A	CM		Congenital myopathy with fingerprint bodies		2		Quadriceps; Triceps surae	ND		Fibre size variability, Central nuclei, Occasional necrotic fibres, Type 2 predominance, Myofibrillar disorganisation, Fingerprint bodies	Yes	No	Yes	ND	Yes	ND	Increased	Increased	Yes	No	No	Yes	ND	No	increased fibre size variability		ND	ND		NN	ND	No	NA	No	Yes	Yes	myofibrillar disorganisation, fingerprint bodies
